# Supplementary material for: Salivary Lipids of Patients with Non-Small Cell Lung Cancer Show Perturbation with Respect to Plasma
Source: MDPI journal article supplement (doi:10.3390/ijms241814264), 2023-09-19
Supplement: s1 [file s1]

Supplementary Material for

# Salivary Lipids of Patients with Non-Small Cell Lung Cancer Show Perturbation with Respect to Plasma

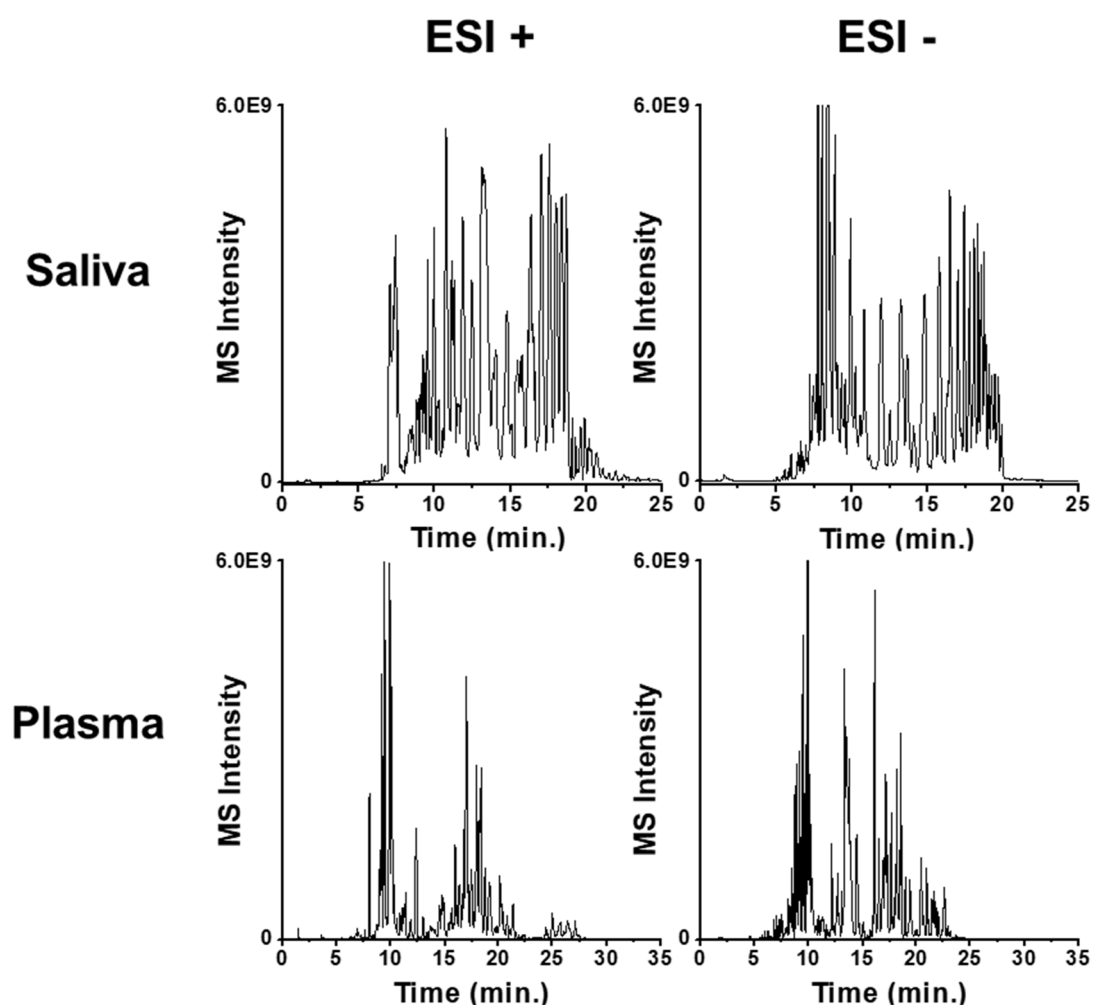

Figure S1. Base peak chromatograms of lipid extracts from saliva and plasma of patients with NSCLC at positive (ESI+) and negative (ESI-) ion modes of nUHPLC-ESI-MS/MS.

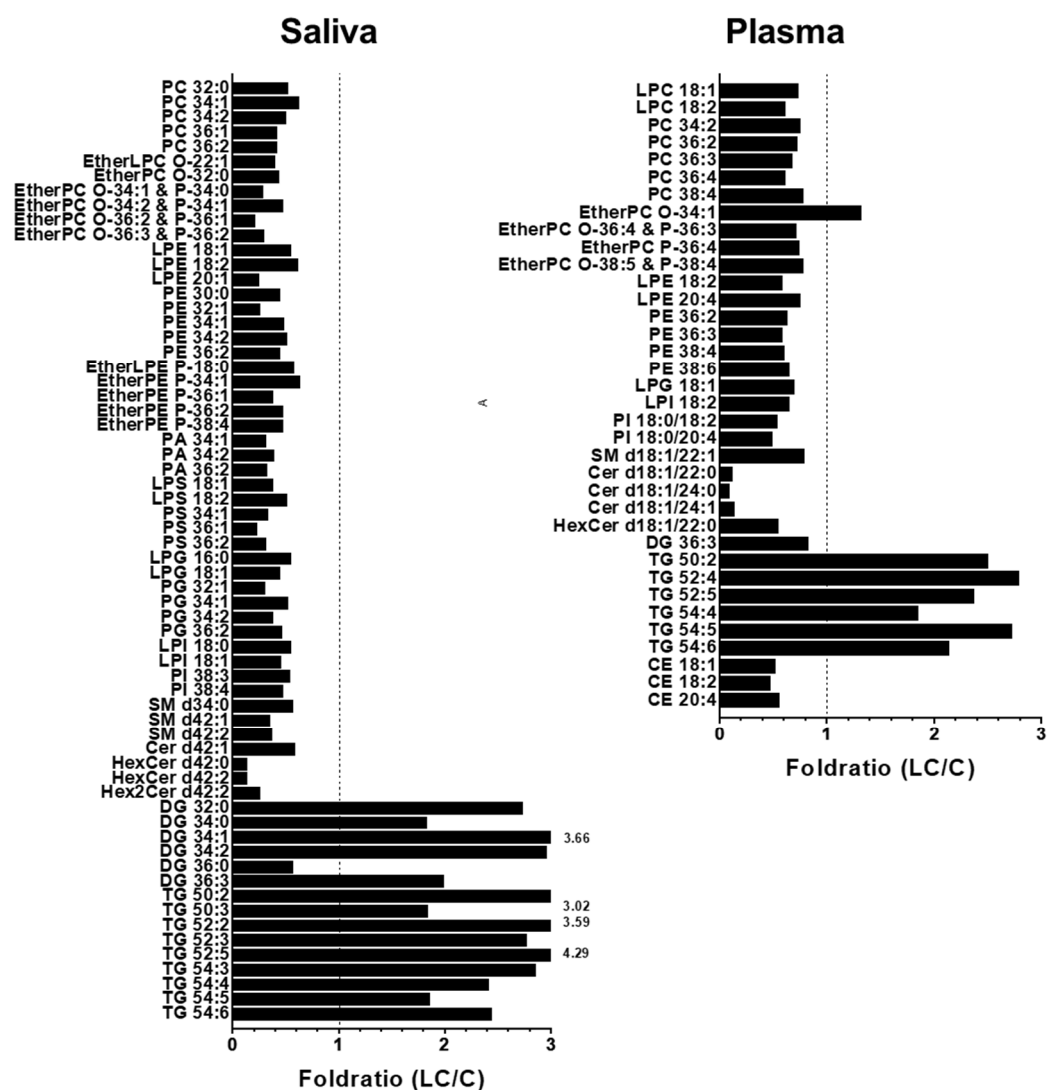

Figure S2. Bar graphs showing fold ratio (LC/C) of each lipid species with statistical significance ( $p < 0.05$ ) in saliva and plasma samples with LC compared to controls.

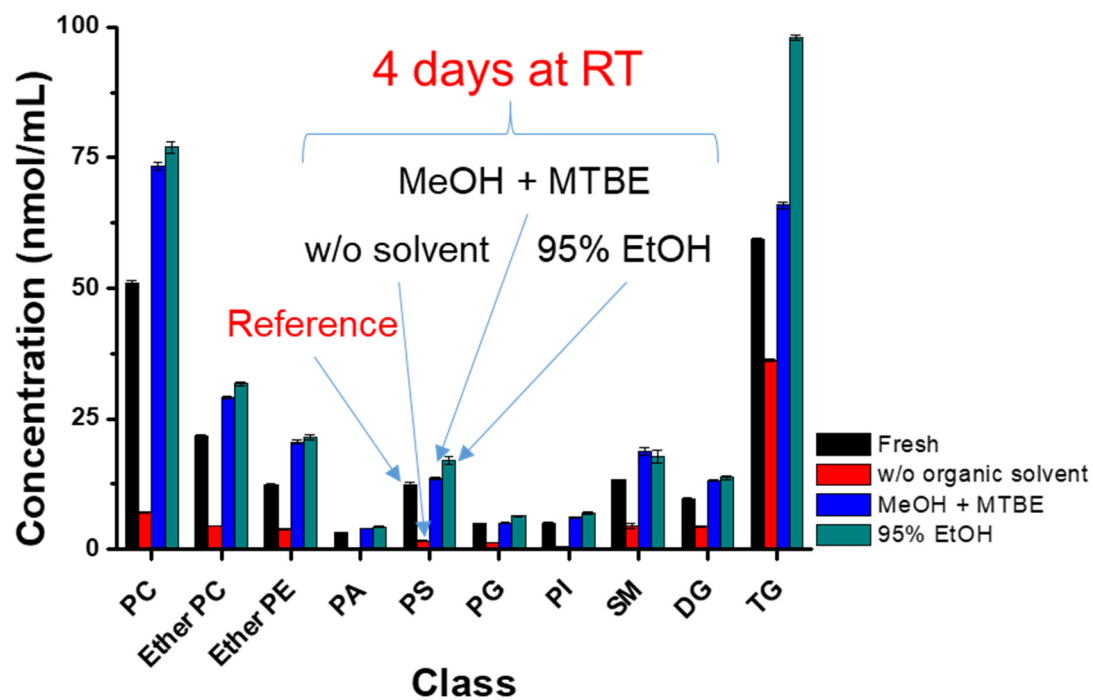

Figure S3. Concentration of each lipid class of saliva upon the immediate extraction after sampling, the exposure to room temperature (RT) with or without adding organic solvents followed by 4 days of exposure to RT. Error bar was obtained from repeated measurements ( $n = 5$ ).

Table S1. Concentration of lipid species (nmol/mL) in saliva and plasma samples from both the control and the lung cancer groups. Lipid concentration was calculated from a calibration curve of each lipid class. Species marked with underline for high abundance species in each lipid class. Numbers in the parenthesis represent the quantified/identified numbers of lipids. N.D. represents for “not detectable” as below LOD (S/N = 3). Concentration values marked with grey represent for the calculated concentration below LOQ (S/N=10). LC: lung cancer, C: control.

| Saliva          |                   |            |                         |             |             |                      |
|-----------------|-------------------|------------|-------------------------|-------------|-------------|----------------------|
| Class           | Molecular species | <i>m/z</i> | Concentration (nmol/mL) |             | abund. (%)  | Fold ratio LC/C      |
|                 |                   |            | C                       | LC          |             |                      |
| LPC<br>(9)      | 14:0              | 468.309    | 0.03 ± 0.03             | 0.04 ± 0.00 | 1.2         | 1.16 ± 1.08          |
|                 | 16:1              | 494.324    | 0.08 ± 0.01             | 0.12 ± 0.01 | 3.1         | 1.48 ± 0.25          |
|                 | 16:0              | 496.340    | 0.42 ± 0.14             | 0.45 ± 0.01 | <u>17.5</u> | 1.00 ± 0.30          |
|                 | 18:2              | 520.340    | 0.55 ± 0.08             | 0.51 ± 0.02 | <u>21.3</u> | 0.78 ± 0.11          |
|                 | 18:1              | 522.355    | 1.02 ± 0.07             | 0.99 ± 0.02 | <u>40.0</u> | 0.75 ± 0.06          |
|                 | 18:0              | 524.371    | 0.20 ± 0.05             | 0.20 ± 0.01 | 8.2         | 0.93 ± 0.22          |
|                 | 20:4              | 544.340    | 0.15 ± 0.05             | 0.11 ± 0.01 | 6.2         | 0.53 ± 0.18**        |
|                 | 20:3              | 546.355    | 0.06 ± 0.02             | 0.04 ± 0.00 | 2.5         | <b>0.49 ± 0.13**</b> |
|                 | 22:5              | 570.355    | N.D.                    | N.D.        | -           | -                    |
| PC<br>(21)      | 30:0              | 706.538    | 0.06 ± 0.01             | 0.05 ± 0.08 | 0.8         | 0.91 ± 0.61          |
|                 | 32:1              | 732.554    | 0.29 ± 0.02             | 0.19 ± 0.09 | 3.9         | 0.66 ± 0.15          |
|                 | 32:0              | 734.569    | 0.63 ± 0.05             | 0.32 ± 0.16 | <u>8.3</u>  | 0.52 ± 0.13**        |
|                 | 34:2              | 758.569    | 1.14 ± 0.06             | 0.57 ± 0.13 | <u>15.1</u> | <b>0.50 ± 0.06**</b> |
|                 | 34:1              | 760.585    | 1.27 ± 0.11             | 0.79 ± 0.17 | <u>16.9</u> | 0.62 ± 0.08**        |
|                 | 34:0              | 762.601    | 0.28 ± 0.04             | 0.05 ± 0.02 | 3.7         | <b>0.17 ± 0.04**</b> |
|                 | 36:4              | 782.569    | 0.38 ± 0.03             | 0.07 ± 0.01 | 5.0         | <b>0.18 ± 0.02**</b> |
|                 | 36:3              | 784.585    | 0.65 ± 0.01             | 0.33 ± 0.02 | <u>8.7</u>  | 0.51 ± 0.02**        |
|                 | 36:2              | 786.601    | 1.29 ± 0.08             | 0.54 ± 0.08 | <u>17.2</u> | <b>0.42 ± 0.04**</b> |
|                 | 36:1              | 788.616    | 0.96 ± 0.17             | 0.40 ± 0.06 | <u>12.8</u> | <b>0.41 ± 0.08**</b> |
|                 | 36:0              | 790.632    | N.D.                    | N.D.        | -           | -                    |
|                 | 38:6              | 806.569    | 0.07 ± 0.00             | N.D.        | 0.9         | -                    |
|                 | 38:5              | 808.585    | 0.12 ± 0.01             | 0.04 ± 0.00 | 1.6         | <b>0.36 ± 0.02**</b> |
|                 | 38:4              | 810.601    | 0.11 ± 0.01             | 0.04 ± 0.01 | 1.4         | <b>0.41 ± 0.04**</b> |
|                 | 38:3              | 812.616    | 0.12 ± 0.01             | N.D.        | 1.6         | -                    |
|                 | 38:2              | 814.632    | 0.12 ± 0.02             | N.D.        | 1.5         | -                    |
|                 | 38:1              | 816.648    | 0.04 ± 0.01             | N.D.        | 0.5         | -                    |
|                 | 40:6              | 834.601    | N.D.                    | N.D.        | -           | -                    |
|                 | 40:2              | 842.663    | N.D.                    | N.D.        | -           | -                    |
|                 | 42:0              | 874.726    | N.D.                    | N.D.        | -           | -                    |
|                 | 44:1              | 900.742    | N.D.                    | N.D.        | -           | -                    |
| EtherLPC<br>(6) | O-16:1 and P-16:0 | 482.361    | 0.04 ± 0.00             | N.D.        | 5.5         | -                    |
|                 | O-16:0            | 480.345    | 0.09 ± 0.00             | 0.03 ± 0.00 | 14.3        | <b>0.27 ± 0.04**</b> |
|                 | O-18:1 and P-18:0 | 508.376    | 0.05 ± 0.00             | N.D.        | 7.1         | -                    |
|                 | O-22:1            | 564.439    | 0.11 ± 0.00             | 0.04 ± 0.00 | <u>17.1</u> | <b>0.39 ± 0.05**</b> |
|                 | P-24:1            | 592.470    | 0.10 ± 0.00             | N.D.        | 15.5        | -                    |
|                 | O-24:1            | 590.455    | 0.27 ± 0.01             | 0.15 ± 0.02 | <u>40.5</u> | 0.55 ± 0.09          |
| EtherPC<br>(19) | O-32:2 and P-32:1 | 716.559    | 0.20 ± 0.02             | 0.14 ± 0.00 | 1.2         | 0.71 ± 0.32          |
|                 | O-32:1 and P-32:0 | 718.575    | 0.79 ± 0.01             | 0.43 ± 0.02 | 4.8         | 0.55 ± 0.06**        |

|                 |                   |              |                 |                 |             |                                        |
|-----------------|-------------------|--------------|-----------------|-----------------|-------------|----------------------------------------|
|                 | O-32:0            | 720.590      | $1.78 \pm 0.02$ | $0.76 \pm 0.05$ | <u>10.8</u> | <b><math>0.43 \pm 0.05^{**}</math></b> |
|                 | O-34:3 and P-34:2 | 742.575      | $0.49 \pm 0.01$ | $0.24 \pm 0.01$ | 3.0         | <b><math>0.49 \pm 0.04^{**}</math></b> |
|                 | O-34:2 and P-34:1 | 744.590      | $2.05 \pm 0.04$ | $0.97 \pm 0.05$ | <u>12.4</u> | <b><math>0.47 \pm 0.06^{**}</math></b> |
|                 | O-34:1 and P-34:0 | 746.606      | $2.96 \pm 0.05$ | $0.82 \pm 0.05$ | <u>18.0</u> | <b><math>0.28 \pm 0.03^{**}</math></b> |
|                 | O-36:4            | 768.590      | $0.50 \pm 0.00$ | $0.18 \pm 0.01$ | 3.0         | <b><math>0.36 \pm 0.03^{**}</math></b> |
|                 | O-36:3 and P-36:2 | 770.606      | $0.90 \pm 0.02$ | $0.26 \pm 0.01$ | <u>5.5</u>  | <b><math>0.29 \pm 0.03^{**}</math></b> |
|                 | O-36:2 and P-36:1 | 772.622      | $2.01 \pm 0.05$ | $0.41 \pm 0.01$ | <u>12.2</u> | <b><math>0.20 \pm 0.03^{**}</math></b> |
|                 | O-36:0            | 776.653      | $0.14 \pm 0.00$ | N.D.            | 0.8         | -                                      |
|                 | O-38:5 and P-38:4 | 794.606      | $0.57 \pm 0.01$ | $0.16 \pm 0.01$ | 3.4         | <b><math>0.29 \pm 0.03^{**}</math></b> |
|                 | O-38:4            | 796.622      | $0.65 \pm 0.01$ | $0.16 \pm 0.01$ | 4.0         | <b><math>0.24 \pm 0.03^{**}</math></b> |
|                 | O-38:3            | 798.637      | $0.53 \pm 0.01$ | $0.11 \pm 0.01$ | 3.2         | <b><math>0.20 \pm 0.03^{**}</math></b> |
|                 | O-38:2            | 800.653      | $0.66 \pm 0.02$ | $0.10 \pm 0.00$ | 4.0         | <b><math>0.15 \pm 0.02^{**}</math></b> |
|                 | O-38:1            | 802.668      | $0.38 \pm 0.01$ | $0.04 \pm 0.00$ | 2.3         | <b><math>0.12 \pm 0.02^{**}</math></b> |
|                 | O-38:0            | 804.684      | $0.05 \pm 0.00$ | N.D.            | 0.3         | -                                      |
|                 | O-40:3            | 826.668      | $0.54 \pm 0.02$ | $0.12 \pm 0.01$ | 3.3         | <b><math>0.21 \pm 0.03^{**}</math></b> |
|                 | O-40:2 and P-40:1 | 828.684      | $0.50 \pm 0.02$ | $0.06 \pm 0.00$ | 3.0         | <b><math>0.12 \pm 0.02^{**}</math></b> |
|                 | O-42:3 and P-42:2 | 854.700      | $0.79 \pm 0.02$ | $0.11 \pm 0.01$ | 4.8         | <b><math>0.14 \pm 0.02^{**}</math></b> |
| LPE<br>(13)     | 14:0              | 426.262      | $0.06 \pm 0.01$ | $0.04 \pm 0.01$ | 2.1         | $0.52 \pm 0.23^*$                      |
|                 | 16:1              | 452.277      | $0.21 \pm 0.00$ | $0.15 \pm 0.01$ | 6.1         | $0.73 \pm 0.10$                        |
|                 | 16:0              | 454.293      | $0.47 \pm 0.00$ | $0.32 \pm 0.01$ | <u>13.2</u> | $0.74 \pm 0.04$                        |
|                 | 18:2              | 478.293      | $0.57 \pm 0.01$ | $0.35 \pm 0.01$ | <u>16.3</u> | $0.57 \pm 0.08^{**}$                   |
|                 | 18:1              | 480.309      | $1.05 \pm 0.04$ | $0.57 \pm 0.01$ | <u>29.6</u> | $0.54 \pm 0.10^{**}$                   |
|                 | 18:0              | 482.324      | $0.21 \pm 0.01$ | $0.21 \pm 0.02$ | 5.9         | $1.33 \pm 0.33$                        |
|                 | 20:4              | 502.293      | $0.46 \pm 0.02$ | $0.28 \pm 0.01$ | <u>12.6</u> | $0.68 \pm 0.15$                        |
|                 | 20:3              | 504.309      | $0.04 \pm 0.00$ | $0.04 \pm 0.01$ | 1.0         | $1.16 \pm 0.47$                        |
|                 | 20:2              | 506.324      | $0.02 \pm 0.00$ | N.D.            | 0.6         | -                                      |
|                 | 20:1              | 508.340      | $0.57 \pm 0.01$ | $0.14 \pm 0.01$ | <u>7.9</u>  | <b><math>0.32 \pm 0.06^{**}</math></b> |
|                 | 22:6              | 526.292<br>8 | $0.07 \pm 0.00$ | $0.06 \pm 0.00$ | 2.0         | $1.11 \pm 0.11$                        |
|                 | 22:4              | 530.324      | $0.09 \pm 0.00$ | $0.04 \pm 0.00$ | 2.2         | <b><math>0.42 \pm 0.07^{**}</math></b> |
|                 | 24:0              | 566.418      | $0.03 \pm 0.00$ | $0.02 \pm 0.01$ | 0.5         | $1.09 \pm 1.04$                        |
| PE<br>(14)      | 30:1              | 662.476      | $0.09 \pm 0.00$ | N.D.            | 3.6         | -                                      |
|                 | 30:0              | 664.491      | $0.22 \pm 0.00$ | $0.09 \pm 0.06$ | <u>9.1</u>  | <b><math>0.44 \pm 0.05^{**}</math></b> |
|                 | 32:2              | 688.491      | $0.12 \pm 0.00$ | N.D.            | 5.2         | -                                      |
|                 | 32:1              | 690.507      | $0.25 \pm 0.00$ | $0.06 \pm 0.06$ | <u>10.7</u> | <b><math>0.25 \pm 0.03^{**}</math></b> |
|                 | 32:0              | 692.523      | N.D.            | N.D.            | -           | -                                      |
|                 | 34:3              | 714.507      | $0.05 \pm 0.00$ | N.D.            | 2.0         | -                                      |
|                 | 34:2              | 716.523      | $0.31 \pm 0.00$ | $0.16 \pm 0.07$ | <u>13.3</u> | $0.51 \pm 0.04^{**}$                   |
|                 | 34:1              | 718.538      | $0.21 \pm 0.01$ | $0.10 \pm 0.06$ | <u>8.8</u>  | <b><math>0.48 \pm 0.09^{**}</math></b> |
|                 | 36:4              | 740.523      | $0.05 \pm 0.00$ | N.D.            | 1.9         | -                                      |
|                 | 36:3              | 742.538      | $0.14 \pm 0.00$ | N.D.            | 5.9         | -                                      |
|                 | 36:2              | 744.554      | $0.25 \pm 0.00$ | $0.11 \pm 0.04$ | <u>10.8</u> | <b><math>0.44 \pm 0.03^{**}</math></b> |
|                 | 36:1              | 746.569      | $0.31 \pm 0.00$ | $0.34 \pm 0.19$ | <u>13.0</u> | $1.10 \pm 0.11$                        |
|                 | 38:5              | 766.538      | N.D.            | N.D.            | -           | -                                      |
|                 | 38:2              | 772.585      | $0.37 \pm 0.01$ | $0.28 \pm 0.13$ | <u>15.5</u> | $0.76 \pm 0.09$                        |
| EtherLPE<br>(4) | P-16:0            | 438.298      | $0.29 \pm 0.00$ | $0.24 \pm 0.01$ | <u>35.3</u> | $0.83 \pm 0.07$                        |
|                 | P-18:1            | 464.314      | $0.10 \pm 0.00$ | $0.08 \pm 0.00$ | 11.9        | $0.76 \pm 0.07$                        |

|                 |                   |         |                  |                 |             |                                        |
|-----------------|-------------------|---------|------------------|-----------------|-------------|----------------------------------------|
| EtherPE<br>(15) | P-18:0            | 466.329 | $0.37 \pm 0.01$  | $0.21 \pm 0.01$ | <u>44.1</u> | $0.57 \pm 0.07^*$                      |
|                 | P-20:0            | 494.361 | $0.07 \pm 0.00$  | $0.04 \pm 0.00$ | 8.7         | $0.52 \pm 0.06^*$                      |
|                 | P-32:1            | 674.512 | $0.44 \pm 0.01$  | $0.43 \pm 0.02$ | 2.4         | $0.98 \pm 0.11$                        |
|                 | P-34:2            | 700.528 | $0.84 \pm 0.05$  | $0.52 \pm 0.05$ | 4.6         | $0.62 \pm 0.17^*$                      |
|                 | P-34:1            | 702.543 | $4.46 \pm 0.05$  | $2.80 \pm 0.21$ | <u>24.1</u> | $0.63 \pm 0.06^*$                      |
|                 | P-34:0            | 704.559 | $0.56 \pm 0.03$  | $0.43 \pm 0.04$ | 3.0         | $0.77 \pm 0.19$                        |
|                 | P-36:5            | 730.575 | $1.15 \pm 0.01$  | $0.59 \pm 0.04$ | 6.2         | $0.52 \pm 0.05^*$                      |
|                 | P-36:2            | 728.559 | $2.18 \pm 0.03$  | $1.02 \pm 0.06$ | <u>11.7</u> | <b><math>0.47 \pm 0.04^{**}</math></b> |
|                 | P-36:1            | 748.528 | $2.09 \pm 0.04$  | $0.77 \pm 0.03$ | <u>11.3</u> | <b><math>0.37 \pm 0.04^{**}</math></b> |
|                 | P-38:6            | 750.543 | $0.46 \pm 0.01$  | $0.36 \pm 0.02$ | 2.5         | $0.77 \pm 0.08$                        |
|                 | P-38:4            | 752.559 | $2.33 \pm 0.03$  | $1.10 \pm 0.05$ | <u>12.6</u> | <b><math>0.47 \pm 0.04^{**}</math></b> |
|                 | O-38:4 and P-38:3 | 754.575 | $0.80 \pm 0.01$  | $0.34 \pm 0.02$ | 4.3         | <b><math>0.43 \pm 0.04^{**}</math></b> |
|                 | P-38:2            | 756.590 | $0.38 \pm 0.01$  | $0.16 \pm 0.01$ | 2.0         | <b><math>0.44 \pm 0.05^{**}</math></b> |
|                 | P-38:1            | 758.606 | $0.66 \pm 0.02$  | $0.34 \pm 0.02$ | 3.6         | $0.51 \pm 0.08^*$                      |
|                 | P-38:0            | 760.622 | $0.94 \pm 0.02$  | $0.35 \pm 0.03$ | 5.1         | <b><math>0.37 \pm 0.05^{**}</math></b> |
| LPA<br>(8)      | P-40:5            | 778.575 | $0.46 \pm 0.00$  | $0.18 \pm 0.01$ | 2.5         | <b><math>0.40 \pm 0.03^{**}</math></b> |
|                 | P-40:4            | 780.590 | $0.78 \pm 0.01$  | $0.17 \pm 0.02$ | 4.2         | <b><math>0.22 \pm 0.03^{**}</math></b> |
|                 | 16:1              | 407.220 | N.D.             | N.D.            | -           | -                                      |
|                 | 16:0              | 409.236 | $0.09 \pm 0.01$  | $0.07 \pm 0.02$ | 16.9        | $0.53 \pm 0.23^*$                      |
|                 | 18:3              | 431.220 | N.D.             | N.D.            | -           | -                                      |
|                 | 18:2              | 433.236 | $0.06 \pm 0.00$  | $0.05 \pm 0.01$ | 11.0        | $0.63 \pm 0.17$                        |
|                 | 18:1              | 432.252 | N.D.             | N.D.            | -           | -                                      |
|                 | 18:0              | 437.267 | $0.47 \pm 0.03$  | $0.13 \pm 0.03$ | <u>69.4</u> | <b><math>0.30 \pm 0.12</math></b>      |
|                 | 20:4              | 457.236 | $0.02 \pm 0.00$  | N.D.            | 2.8         | -                                      |
|                 | 20:3              | 459.252 | N.D.             | N.D.            | -           | -                                      |
| PA<br>(6)       | 30:0              | 619.434 | $0.04 \pm 0.00$  | N.D.            | 1.5         | -                                      |
|                 | 34:2              | 671.466 | $0.45 \pm 0.01$  | $0.17 \pm 0.00$ | <u>17.1</u> | <b><math>0.39 \pm 0.03^{**}</math></b> |
|                 | 34:1              | 673.481 | $0.82 \pm 0.01$  | $0.25 \pm 0.00$ | <u>31.0</u> | <b><math>0.31 \pm 0.02^{**}</math></b> |
|                 | 36:3              | 697.481 | $0.31 \pm 0.00$  | $0.09 \pm 0.00$ | 11.6        | <b><math>0.31 \pm 0.02^{**}</math></b> |
|                 | 36:2              | 699.497 | $0.84 \pm 0.01$  | $0.27 \pm 0.00$ | <u>31.8</u> | <b><math>0.32 \pm 0.03^{**}</math></b> |
|                 | 38:4              | 723.497 | $0.19 \pm 0.01$  | $0.08 \pm 0.00$ | 7.1         | <b><math>0.42 \pm 0.09^{**}</math></b> |
| LPS<br>(10)     | 16:1              | 494.253 | $0.24 \pm 0.01$  | $0.16 \pm 0.01$ | 3.6         | $0.65 \pm 0.17$                        |
|                 | 16:0              | 496.268 | N.D.             | N.D.            | -           | -                                      |
|                 | 18:2              | 520.268 | $1.03 \pm 0.03$  | $0.52 \pm 0.06$ | <u>15.5</u> | $0.51 \pm 0.14^{**}$                   |
|                 | 18:1              | 522.284 | $4.05 \pm 0.15$  | $1.52 \pm 0.14$ | <u>61.2</u> | <b><math>0.38 \pm 0.10^{**}</math></b> |
|                 | 18:0              | 524.299 | $0.18 \pm 0.01$  | $0.10 \pm 0.03$ | 2.6         | $0.57 \pm 0.36$                        |
|                 | 20:4              | 544.268 | $0.65 \pm 0.02$  | $0.27 \pm 0.03$ | 9.8         | <b><math>0.42 \pm 0.10^{**}</math></b> |
|                 | 20:3              | 546.284 | $0.25 \pm 0.01$  | $0.14 \pm 0.02$ | 3.8         | $0.54 \pm 0.17^*$                      |
|                 | 22:6              | 568.268 | $0.14 \pm 0.01$  | $0.10 \pm 0.02$ | 2.1         | $0.70 \pm 0.34$                        |
|                 | 22:5              | 570.284 | N.D.             | N.D.            | -           | -                                      |
|                 | 22:0              | 580.362 | $0.08 \pm 0.01$  | N.D.            | 1.2         | -                                      |
| PS<br>(18)      | 30:0              | 706.467 | $0.05 \pm 0.01$  | N.D.            | 0.3         | -                                      |
|                 | 32:2              | 730.467 | $0.10 \pm 0.01$  | $0.04 \pm 0.00$ | 0.6         | <b><math>0.38 \pm 0.22^*</math></b>    |
|                 | 32:1              | 732.482 | $0.16 \pm 0.01$  | $0.05 \pm 0.01$ | 0.9         | <b><math>0.28 \pm 0.15^{**}</math></b> |
|                 | 34:2              | 758.498 | $0.50 \pm 0.02$  | $0.11 \pm 0.00$ | 2.7         | <b><math>0.23 \pm 0.05^{**}</math></b> |
|                 | 34:1              | 760.513 | $1.23 \pm 0.06$  | $0.39 \pm 0.01$ | <u>6.6</u>  | <b><math>0.32 \pm 0.08^{**}</math></b> |
|                 | 36:3              | 784.513 | $0.17 \pm 0.01$  | N.D.            | 0.9         | -                                      |
|                 | 36:2              | 786.529 | $2.45 \pm 0.08$  | $0.74 \pm 0.02$ | <u>13.1</u> | <b><math>0.30 \pm 0.05^{**}</math></b> |
|                 | 36:1              | 788.545 | $12.02 \pm 0.20$ | $2.72 \pm 0.10$ | <u>64.4</u> | <b><math>0.23 \pm 0.03^{**}</math></b> |
|                 | 38:4              | 810.529 | $0.51 \pm 0.03$  | $0.09 \pm 0.00$ | 2.7         | <b><math>0.17 \pm 0.06^{**}</math></b> |
|                 | 38:3              | 812.545 | $0.38 \pm 0.01$  | $0.14 \pm 0.00$ | 2.1         | <b><math>0.35 \pm 0.05^{**}</math></b> |
|                 | 38:2              | 814.560 | $0.27 \pm 0.00$  | $0.07 \pm 0.00$ | 1.5         | <b><math>0.26 \pm 0.03^{**}</math></b> |

|            |      |         |                 |                 |             |                                        |
|------------|------|---------|-----------------|-----------------|-------------|----------------------------------------|
| LPG<br>(9) | 38:1 | 816.576 | $0.06 \pm 0.01$ | $0.08 \pm 0.00$ | 0.3         | $1.36 \pm 0.99$                        |
|            | 40:6 | 834.529 | $0.17 \pm 0.00$ | $0.10 \pm 0.01$ | 0.9         | $0.57 \pm 0.10^*$                      |
|            | 40:2 | 842.592 | $0.14 \pm 0.00$ | $0.04 \pm 0.00$ | 0.8         | $0.27 \pm 0.04^*$                      |
|            | 40:1 | 844.607 | $0.13 \pm 0.01$ | $0.06 \pm 0.00$ | 0.7         | <b><math>0.45 \pm 0.11^{**}</math></b> |
|            | 42:3 | 868.607 | N.D.            | N.D.            | -           | -                                      |
|            | 42:2 | 870.623 | $0.08 \pm 0.00$ | N.D.            | 0.4         | -                                      |
|            | 42:1 | 872.639 | $0.23 \pm 0.02$ | $0.04 \pm 0.00$ | 1.2         | <b><math>0.16 \pm 0.05^{**}</math></b> |
|            | 14:1 | 453.226 | N.D.            | N.D.            | -           | -                                      |
|            | 14:0 | 455.242 | N.D.            | N.D.            | -           | -                                      |
|            | 16:1 | 481.257 | N.D.            | N.D.            | -           | -                                      |
|            | 16:0 | 483.273 | $0.10 \pm 0.00$ | $0.05 \pm 0.03$ | <u>33.1</u> | $0.54 \pm 0.14^*$                      |
|            | 18:2 | 507.273 | $0.03 \pm 0.00$ | $0.02 \pm 0.01$ | 9.4         | $0.56 \pm 0.25^*$                      |
|            | 18:1 | 509.289 | $0.13 \pm 0.02$ | $0.06 \pm 0.03$ | <u>44.2</u> | <b><math>0.44 \pm 0.25^*</math></b>    |
|            | 18:0 | 511.304 | $0.04 \pm 0.01$ | $0.02 \pm 0.02$ | 13.2        | $0.53 \pm 0.58^*$                      |
|            | 20:3 | 533.289 | N.D.            | N.D.            | -           | -                                      |
|            | 20:1 | 537.320 | N.D.            | N.D.            | -           | -                                      |
| PG<br>(19) | 30:1 | 691.456 | N.D.            | N.D.            | -           | -                                      |
|            | 30:0 | 693.471 | $0.08 \pm 0.03$ | $0.05 \pm 0.00$ | 3.4         | $0.66 \pm 0.98$                        |
|            | 32:1 | 719.487 | $0.22 \pm 0.23$ | $0.07 \pm 0.00$ | <u>9.4</u>  | <b><math>0.30 \pm 1.49^{**}</math></b> |
|            | 32:0 | 721.503 | $0.14 \pm 0.08$ | $0.13 \pm 0.01$ | 5.9         | $0.96 \pm 2.56$                        |
|            | 34:3 | 743.487 | $0.04 \pm 0.08$ | N.D.            | 1.5         | -                                      |
|            | 34:2 | 745.503 | $0.25 \pm 0.07$ | $0.09 \pm 0.01$ | <u>10.7</u> | <b><math>0.37 \pm 0.52^{**}</math></b> |
|            | 34:1 | 747.518 | $0.60 \pm 0.23$ | $0.31 \pm 0.03$ | <u>25.7</u> | $0.52 \pm 0.95^*$                      |
|            | 34:0 | 749.534 | $0.15 \pm 0.14$ | $0.03 \pm 0.00$ | 6.5         | <b><math>0.20 \pm 0.82^{**}</math></b> |
|            | 36:4 | 769.503 | $0.09 \pm 0.14$ | $0.04 \pm 0.00$ | 4.0         | <b><math>0.38 \pm 2.73^{**}</math></b> |
|            | 36:3 | 771.518 | $0.20 \pm 0.08$ | $0.08 \pm 0.01$ | 8.6         | <b><math>0.38 \pm 0.74^{**}</math></b> |
|            | 36:2 | 773.534 | $0.46 \pm 0.16$ | $0.21 \pm 0.04$ | <u>19.7</u> | <b><math>0.46 \pm 0.77^{**}</math></b> |
|            | 36:1 | 775.550 | $0.11 \pm 0.02$ | $0.08 \pm 0.02$ | 4.6         | $0.75 \pm 0.81$                        |
|            | 36:0 | 777.565 | N.D.            | N.D.            | -           | -                                      |
|            | 38:5 | 795.518 | N.D.            | N.D.            | -           | -                                      |
|            | 38:4 | 797.534 | N.D.            | N.D.            | -           | -                                      |
|            | 38:3 | 799.550 | N.D.            | N.D.            | -           | -                                      |
|            | 38:2 | 801.565 | N.D.            | N.D.            | -           | -                                      |
|            | 40:7 | 819.518 | N.D.            | N.D.            | -           | -                                      |
|            | 40:6 | 821.534 | N.D.            | N.D.            | -           | -                                      |
| LPI<br>(8) | 16:1 | 569.273 | $0.54 \pm 0.03$ | $0.75 \pm 0.00$ | 3.4         | $1.40 \pm 0.34$                        |
|            | 16:0 | 571.289 | $2.63 \pm 0.47$ | $1.87 \pm 0.01$ | <u>16.6</u> | $0.71 \pm 0.60$                        |
|            | 18:2 | 595.289 | $1.48 \pm 0.10$ | $1.36 \pm 0.00$ | 9.4         | $0.92 \pm 0.31$                        |
|            | 18:1 | 597.305 | $3.78 \pm 0.42$ | $1.71 \pm 0.01$ | <u>23.9</u> | $0.45 \pm 0.24^*$                      |
|            | 18:0 | 599.320 | $6.00 \pm 0.31$ | $3.24 \pm 0.01$ | <u>37.9</u> | $0.54 \pm 0.14^{**}$                   |
|            | 20:4 | 619.289 | $0.98 \pm 0.08$ | $0.57 \pm 0.00$ | 6.2         | $0.59 \pm 0.23$                        |
|            | 20:3 | 621.305 | $0.42 \pm 0.01$ | $0.21 \pm 0.00$ | 2.7         | $0.51 \pm 0.12^*$                      |
|            | 22:5 | 645.305 | N.D.            | N.D.            | -           | -                                      |
| PI<br>(22) | 28:0 | 753.456 | $0.01 \pm 0.00$ | $0.00 \pm 0.00$ | 0.1         | $0.56 \pm 0.43$                        |
|            | 30:0 | 781.487 | $0.03 \pm 0.01$ | $0.02 \pm 0.00$ | 0.4         | $0.72 \pm 0.67$                        |
|            | 32:2 | 805.487 | $0.06 \pm 0.00$ | $0.04 \pm 0.00$ | 0.7         | $0.56 \pm 0.08^{**}$                   |
|            | 32:1 | 807.503 | $0.27 \pm 0.01$ | $0.21 \pm 0.00$ | 2.9         | $0.77 \pm 0.13$                        |
|            | 32:0 | 809.519 | $0.18 \pm 0.05$ | $0.10 \pm 0.00$ | 1.9         | $0.56 \pm 0.75^*$                      |
|            | 34:3 | 831.503 | $0.08 \pm 0.00$ | $0.06 \pm 0.00$ | 0.8         | $0.79 \pm 0.08$                        |
|            | 34:2 | 833.519 | $0.61 \pm 0.01$ | $0.65 \pm 0.01$ | <u>6.5</u>  | $1.06 \pm 0.12$                        |
|            | 34:1 | 835.534 | $1.25 \pm 0.04$ | $0.96 \pm 0.03$ | <u>13.3</u> | $0.77 \pm 0.13$                        |
|            | 34:0 | 837.550 | $0.37 \pm 0.03$ | $0.13 \pm 0.01$ | 3.9         | <b><math>0.35 \pm 0.12^{**}</math></b> |
|            | 36:4 | 857.519 | $0.15 \pm 0.00$ | $0.13 \pm 0.00$ | 1.6         | $0.86 \pm 0.10$                        |

|                |       |         |                 |                 |             |                                        |
|----------------|-------|---------|-----------------|-----------------|-------------|----------------------------------------|
| SM<br>(16)     | 36:3  | 859.534 | $0.42 \pm 0.00$ | $0.26 \pm 0.00$ | <u>4.5</u>  | $0.63 \pm 0.04$                        |
|                | 36:2  | 861.550 | $1.55 \pm 0.06$ | $1.09 \pm 0.07$ | <u>16.5</u> | $0.70 \pm 0.16$                        |
|                | 36:1  | 863.566 | $0.99 \pm 0.04$ | $0.53 \pm 0.02$ | <u>10.5</u> | $0.54 \pm 0.11$                        |
|                | 36:0  | 865.581 | $0.02 \pm 0.00$ | $0.01 \pm 0.00$ | 0.2         | <b><math>0.28 \pm 0.26^{**}</math></b> |
|                | 38:6  | 881.519 | $0.02 \pm 0.00$ | $0.01 \pm 0.00$ | 0.2         | $0.76 \pm 0.22$                        |
|                | 38:5  | 883.534 | $0.12 \pm 0.00$ | $0.06 \pm 0.00$ | 1.3         | $0.49 \pm 0.05^*$                      |
|                | 38:4  | 885.550 | $2.09 \pm 0.07$ | $0.99 \pm 0.03$ | <u>22.3</u> | <b><math>0.47 \pm 0.08^{**}</math></b> |
|                | 38:3  | 887.566 | $0.95 \pm 0.03$ | $0.51 \pm 0.03$ | <u>10.1</u> | $0.54 \pm 0.11^*$                      |
|                | 38:2  | 889.581 | $0.07 \pm 0.00$ | $0.07 \pm 0.00$ | 0.8         | $0.94 \pm 0.31$                        |
|                | 38:1  | 891.597 | $0.01 \pm 0.00$ | $0.01 \pm 0.00$ | 0.1         | $0.68 \pm 0.39$                        |
|                | 40:5  | 911.566 | $0.05 \pm 0.00$ | $0.03 \pm 0.00$ | 0.5         | $0.64 \pm 0.09$                        |
|                | 40:4  | 913.581 | $0.07 \pm 0.00$ | $0.06 \pm 0.00$ | 0.8         | $0.83 \pm 0.16$                        |
|                | d32:1 | 675.544 | $1.55 \pm 0.03$ | $0.87 \pm 0.03$ | 4.5         | $0.56 \pm 0.06^{**}$                   |
|                | d32:0 | 677.559 | $0.27 \pm 0.01$ | $0.23 \pm 0.01$ | 0.8         | $0.84 \pm 0.09$                        |
|                | d34:2 | 701.559 | $1.02 \pm 0.02$ | $0.57 \pm 0.02$ | 3.0         | $0.55 \pm 0.07^{**}$                   |
|                | d34:1 | 703.575 | $8.86 \pm 0.12$ | $8.09 \pm 0.24$ | <u>25.7</u> | $0.91 \pm 0.08$                        |
|                | d34:0 | 705.591 | $6.83 \pm 0.16$ | $3.82 \pm 0.17$ | <u>19.8</u> | $0.56 \pm 0.08^{**}$                   |
|                | d36:2 | 729.591 | $0.28 \pm 0.01$ | $0.10 \pm 0.01$ | 0.8         | <b><math>0.37 \pm 0.06^{**}</math></b> |
|                | d36:1 | 731.606 | $1.00 \pm 0.02$ | $0.46 \pm 0.02$ | 2.9         | <b><math>0.46 \pm 0.06^{**}</math></b> |
|                | d36:0 | 733.622 | $1.30 \pm 0.03$ | $0.63 \pm 0.02$ | 3.8         | <b><math>0.49 \pm 0.06^{**}</math></b> |
|                | d38:2 | 757.622 | $0.10 \pm 0.00$ | N.D.            | 0.3         | -                                      |
|                | d38:1 | 759.637 | $0.75 \pm 0.04$ | $0.36 \pm 0.01$ | 2.2         | <b><math>0.48 \pm 0.11^{**}</math></b> |
|                | d40:2 | 785.653 | $0.57 \pm 0.02$ | $0.18 \pm 0.01$ | 1.6         | <b><math>0.32 \pm 0.06^{**}</math></b> |
|                | d40:1 | 787.669 | $1.67 \pm 0.10$ | $0.63 \pm 0.02$ | 4.8         | <b><math>0.38 \pm 0.11^{**}</math></b> |
|                | d40:0 | 789.684 | $1.20 \pm 0.06$ | $0.33 \pm 0.01$ | 3.5         | <b><math>0.28 \pm 0.07^{**}</math></b> |
|                | d42:2 | 813.684 | $5.36 \pm 0.23$ | $1.98 \pm 0.06$ | <u>15.5</u> | <b><math>0.37 \pm 0.08^{**}</math></b> |
|                | d42:1 | 815.700 | $2.54 \pm 0.14$ | $0.87 \pm 0.04$ | <u>7.3</u>  | <b><math>0.34 \pm 0.09^{**}</math></b> |
|                | d42:0 | 817.716 | $1.21 \pm 0.07$ | $0.34 \pm 0.02$ | 3.5         | <b><math>0.28 \pm 0.08^{**}</math></b> |
| Cer<br>(15)    | d34:2 | 536.504 | $0.11 \pm 0.01$ | $0.56 \pm 0.10$ | 2.3         | <b><math>5.17 \pm 1.29^{**}</math></b> |
|                | d34:1 | 538.519 | $0.59 \pm 0.04$ | $1.09 \pm 0.42$ | <u>12.9</u> | $1.83 \pm 0.71^*$                      |
|                | d34:0 | 540.535 | $0.54 \pm 0.02$ | $1.00 \pm 0.55$ | <u>11.7</u> | $1.85 \pm 0.62^*$                      |
|                | d36:2 | 564.535 | $0.04 \pm 0.00$ | $0.08 \pm 0.04$ | 0.9         | $1.90 \pm 0.46^*$                      |
|                | d36:1 | 566.551 | $0.24 \pm 0.01$ | $0.37 \pm 0.09$ | 5.2         | $1.56 \pm 0.29$                        |
|                | d36:0 | 568.566 | $0.34 \pm 0.01$ | $0.28 \pm 0.11$ | <u>7.3</u>  | $0.84 \pm 0.19$                        |
|                | d38:1 | 594.582 | $0.20 \pm 0.01$ | $0.19 \pm 0.08$ | 4.3         | $0.97 \pm 0.22$                        |
|                | d38:0 | 596.598 | $0.29 \pm 0.00$ | $0.08 \pm 0.05$ | 6.3         | <b><math>0.27 \pm 0.08^{**}</math></b> |
|                | d40:1 | 622.613 | $0.21 \pm 0.00$ | $0.22 \pm 0.05$ | 4.6         | $1.03 \pm 0.12$                        |
|                | d40:0 | 624.629 | $0.19 \pm 0.00$ | $0.14 \pm 0.06$ | 4.1         | $0.76 \pm 0.16$                        |
|                | d42:2 | 648.629 | $0.48 \pm 0.01$ | $0.48 \pm 0.08$ | <u>10.3</u> | $1.01 \pm 0.10$                        |
|                | d42:1 | 650.645 | $0.49 \pm 0.01$ | $0.28 \pm 0.04$ | <u>10.7</u> | $0.58 \pm 0.05^*$                      |
|                | d42:0 | 652.660 | $0.31 \pm 0.01$ | $0.46 \pm 0.16$ | <u>6.8</u>  | $1.46 \pm 0.35$                        |
|                | d44:1 | 678.676 | $0.27 \pm 0.01$ | $0.27 \pm 0.13$ | 5.8         | $1.02 \pm 0.24$                        |
|                | d44:0 | 680.692 | $0.30 \pm 0.00$ | $0.21 \pm 0.04$ | 6.6         | $0.69 \pm 0.07$                        |
| HexCer<br>(4)  | d34:1 | 862.625 | $0.36 \pm 0.04$ | $0.05 \pm 0.01$ | 20.8        | <b><math>0.14 \pm 0.07^{**}</math></b> |
|                | d40:0 | 946.719 | $0.33 \pm 0.01$ | $0.04 \pm 0.01$ | 19.3        | <b><math>0.13 \pm 0.03^{**}</math></b> |
|                | d42:2 | 972.735 | $0.48 \pm 0.02$ | $0.06 \pm 0.02$ | <u>28.0</u> | <b><math>0.13 \pm 0.03^{**}</math></b> |
| Hex2Cer<br>(4) | d42:0 | 974.750 | $0.55 \pm 0.02$ | $0.07 \pm 0.01$ | <u>31.9</u> | <b><math>0.12 \pm 0.03^{**}</math></b> |
|                | d34:1 | 862.625 | $1.31 \pm 0.02$ | $0.76 \pm 0.06$ | <u>32.0</u> | $0.58 \pm 0.06$                        |
|                | d40:1 | 946.719 | $0.32 \pm 0.01$ | $0.05 \pm 0.01$ | 7.8         | <b><math>0.14 \pm 0.03^{**}</math></b> |
|                | d42:2 | 972.735 | $1.96 \pm 0.09$ | $0.49 \pm 0.06$ | <u>47.6</u> | <b><math>0.25 \pm 0.06^{**}</math></b> |
| DG<br>(14)     | d42:1 | 974.750 | $0.52 \pm 0.02$ | $0.11 \pm 0.02$ | 12.7        | <b><math>0.22 \pm 0.05^{**}</math></b> |
|                | 30:0  | 558.509 | $0.76 \pm 0.02$ | $2.67 \pm 0.12$ | 1.4         | <b><math>3.52 \pm 0.84^{**}</math></b> |
|                | 32:2  | 582.509 | $0.30 \pm 0.01$ | $1.73 \pm 0.05$ | 0.6         | <b><math>5.71 \pm 1.29^{**}</math></b> |



TG  
(43)

|      |         |                 |                  |             |                                          |
|------|---------|-----------------|------------------|-------------|------------------------------------------|
| 32:1 | 584.525 | $1.61 \pm 0.02$ | $5.74 \pm 0.19$  | 3.0         | <b><math>3.57 \pm 0.56^{**}</math></b>   |
| 32:0 | 586.541 | $5.19 \pm 0.06$ | $14.19 \pm 0.41$ | <u>9.7</u>  | <b><math>2.73 \pm 0.38^{**}</math></b>   |
| 34:2 | 610.541 | $4.94 \pm 0.06$ | $14.60 \pm 0.46$ | <u>9.2</u>  | <b><math>2.95 \pm 0.45^{**}</math></b>   |
| 34:1 | 612.556 | $7.05 \pm 0.08$ | $25.83 \pm 0.78$ | <u>13.1</u> | <b><math>3.67 \pm 0.53^{**}</math></b>   |
| 34:0 | 614.572 | $5.63 \pm 0.11$ | $10.28 \pm 0.52$ | <u>10.5</u> | $1.82 \pm 0.44^{**}$                     |
| 36:4 | 634.541 | $1.94 \pm 0.04$ | $10.01 \pm 0.34$ | 3.6         | <b><math>5.16 \pm 0.93^{**}</math></b>   |
| 36:3 | 636.556 | $4.46 \pm 0.04$ | $8.84 \pm 0.22$  | <u>8.3</u>  | $1.98 \pm 0.23^{**}$                     |
| 36:2 | 638.572 | $8.89 \pm 0.12$ | $16.84 \pm 0.58$ | 16.6        | $1.89 \pm 0.31^*$                        |
| 36:1 | 640.588 | $2.70 \pm 0.05$ | $4.38 \pm 0.28$  | 5.0         | $1.62 \pm 0.48^*$                        |
| 36:0 | 642.603 | $4.91 \pm 0.09$ | $2.77 \pm 0.09$  | <u>9.1</u>  | $0.57 \pm 0.10^{**}$                     |
| 38:4 | 662.572 | $3.38 \pm 0.07$ | $1.78 \pm 0.08$  | 6.3         | $0.52 \pm 0.12^{**}$                     |
| 38:3 | 664.588 | $1.88 \pm 0.03$ | $1.25 \pm 0.04$  | 3.5         | $0.66 \pm 0.10$                          |
| 38:0 | 684.614 | $1.07 \pm 0.18$ | $13.47 \pm 5.61$ | 1.2         | <b><math>12.62 \pm 17.76^{**}</math></b> |
| 40:0 | 712.645 | $0.55 \pm 0.03$ | $5.41 \pm 0.81$  | 0.6         | <b><math>9.75 \pm 4.92^{**}</math></b>   |
| 42:2 | 736.645 | $0.37 \pm 0.01$ | $2.25 \pm 0.57$  | 0.4         | <b><math>6.08 \pm 4.46</math></b>        |
| 42:1 | 738.661 | $0.72 \pm 0.02$ | $2.11 \pm 0.33$  | 0.8         | <b><math>2.91 \pm 1.36</math></b>        |
| 42:0 | 740.676 | $0.77 \pm 0.02$ | $3.14 \pm 0.38$  | 0.8         | <b><math>4.07 \pm 1.47^{**}</math></b>   |
| 44:3 | 762.661 | $0.29 \pm 0.01$ | $0.80 \pm 0.23$  | 0.3         | <b><math>2.78 \pm 2.27</math></b>        |
| 44:2 | 764.676 | $0.90 \pm 0.01$ | $1.94 \pm 0.13$  | 1.0         | <b><math>2.16 \pm 0.45^*</math></b>      |
| 44:1 | 766.692 | $1.00 \pm 0.04$ | $4.47 \pm 0.99$  | 1.1         | <b><math>4.49 \pm 2.90^{**}</math></b>   |
| 44:0 | 768.708 | $0.43 \pm 0.01$ | $2.49 \pm 0.23$  | 0.5         | <b><math>5.79 \pm 1.70^{**}</math></b>   |
| 46:3 | 790.692 | $0.61 \pm 0.01$ | $1.06 \pm 0.21$  | 0.7         | $1.75 \pm 1.00$                          |
| 46:2 | 792.708 | $1.46 \pm 0.03$ | $3.33 \pm 0.32$  | 1.6         | <b><math>2.27 \pm 0.67^*</math></b>      |
| 46:1 | 794.723 | $1.28 \pm 0.03$ | $4.34 \pm 0.36$  | 1.4         | <b><math>3.39 \pm 0.88^{**}</math></b>   |
| 46:0 | 796.739 | $0.59 \pm 0.02$ | $1.67 \pm 0.25$  | 0.6         | <b><math>2.80 \pm 1.26^{**}</math></b>   |
| 48:3 | 818.723 | $1.28 \pm 0.03$ | $1.12 \pm 0.18$  | 1.4         | $0.87 \pm 0.41$                          |
| 48:2 | 820.739 | $2.07 \pm 0.03$ | $3.77 \pm 0.29$  | 2.2         | $1.82 \pm 0.41^*$                        |
| 48:1 | 822.755 | $1.81 \pm 0.01$ | $6.07 \pm 0.87$  | 2.0         | <b><math>3.35 \pm 1.35^{**}</math></b>   |
| 48:0 | 824.770 | $0.59 \pm 0.01$ | $1.66 \pm 0.27$  | 0.6         | <b><math>2.83 \pm 1.32^{**}</math></b>   |
| 50:3 | 846.755 | $3.98 \pm 0.04$ | $7.30 \pm 0.32$  | <u>4.3</u>  | $1.83 \pm 0.24^{**}$                     |
| 50:2 | 848.770 | $4.63 \pm 0.05$ | $14.01 \pm 1.49$ | <u>5.0</u>  | <b><math>3.02 \pm 0.92^{**}</math></b>   |
| 50:1 | 850.786 | $1.82 \pm 0.06$ | $6.21 \pm 2.09$  | 2.0         | <b><math>3.41 \pm 3.27^{**}</math></b>   |
| 50:0 | 852.802 | $0.32 \pm 0.01$ | $0.37 \pm 0.11$  | 0.3         | $1.16 \pm 0.96$                          |
| 52:6 | 868.739 | $0.54 \pm 0.02$ | $0.72 \pm 0.03$  | 0.6         | $1.32 \pm 0.25$                          |
| 52:5 | 870.755 | $2.78 \pm 0.05$ | $9.98 \pm 1.27$  | <u>3.0</u>  | <b><math>3.59 \pm 1.32^{**}</math></b>   |
| 52:4 | 872.770 | $8.52 \pm 0.11$ | $19.45 \pm 0.76$ | <u>9.2</u>  | <b><math>2.28 \pm 0.29^*</math></b>      |
| 52:3 | 874.786 | $8.52 \pm 0.13$ | $23.60 \pm 2.00$ | <u>9.2</u>  | <b><math>2.77 \pm 0.69^{**}</math></b>   |
| 52:2 | 876.802 | $5.04 \pm 0.18$ | $21.61 \pm 3.16$ | <u>5.5</u>  | <b><math>4.29 \pm 1.90^{**}</math></b>   |
| 52:1 | 878.817 | $0.98 \pm 0.06$ | $2.62 \pm 0.76$  | 1.1         | <b><math>2.68 \pm 2.32^{**}</math></b>   |
| 54:8 | 892.739 | $0.11 \pm 0.01$ | $0.01 \pm 0.01$  | 0.1         | <b><math>0.08 \pm 0.28^*</math></b>      |
| 54:7 | 894.755 | $0.98 \pm 0.05$ | $1.56 \pm 0.09$  | 1.1         | $1.59 \pm 0.44$                          |
| 54:6 | 896.770 | $6.83 \pm 0.23$ | $16.67 \pm 0.80$ | <u>7.4</u>  | <b><math>2.44 \pm 0.51^*</math></b>      |
| 54:5 | 898.786 | $9.58 \pm 0.16$ | $17.72 \pm 0.78$ | <u>10.4</u> | $1.85 \pm 0.27^*$                        |
| 54:4 | 900.802 | $8.61 \pm 0.17$ | $20.75 \pm 1.01$ | <u>9.3</u>  | <b><math>2.41 \pm 0.40^{**}</math></b>   |
| 54:3 | 902.817 | $5.25 \pm 0.28$ | $14.97 \pm 1.32$ | <u>5.7</u>  | <b><math>2.85 \pm 1.00^{**}</math></b>   |
| 54:2 | 904.833 | $1.25 \pm 0.10$ | $2.87 \pm 0.63$  | 1.4         | <b><math>2.30 \pm 1.65^{**}</math></b>   |
| 54:0 | 906.849 | $0.22 \pm 0.01$ | $0.32 \pm 0.17$  | 0.2         | $1.44 \pm 2.25$                          |
| 56:8 | 920.770 | $0.70 \pm 0.01$ | $0.31 \pm 0.15$  | 0.8         | $0.43 \pm 0.58^*$                        |
| 56:7 | 922.786 | $1.50 \pm 0.03$ | $1.01 \pm 0.26$  | 1.6         | $0.68 \pm 0.49$                          |
| 56:6 | 924.802 | $1.70 \pm 0.02$ | $0.21 \pm 0.04$  | 1.8         | <b><math>0.12 \pm 0.07^{**}</math></b>   |
| 56:5 | 926.817 | $1.12 \pm 0.04$ | $0.68 \pm 0.05$  | 1.2         | $0.61 \pm 0.15^*$                        |
| 56:4 | 928.833 | $0.56 \pm 0.04$ | $0.40 \pm 0.03$  | 0.6         | $0.71 \pm 0.25$                          |
| 56:3 | 930.849 | $0.27 \pm 0.02$ | $0.17 \pm 0.02$  | 0.3         | $0.64 \pm 0.30$                          |

|                 | 56:2              | 932.864    | 0.11 ± 0.01             | 0.09 ± 0.02  | 0.1         | 0.87 ± 0.57          |
|-----------------|-------------------|------------|-------------------------|--------------|-------------|----------------------|
|                 | 58:8              | 948.801    | 0.43 ± 0.01             | 0.08 ± 0.01  | 0.5         | <b>0.19 ± 0.08**</b> |
| Plasma          |                   |            |                         |              |             |                      |
| Class           | Molecular species | <i>m/z</i> | Concentration (nmol/mL) |              | abund. (%)  | Fold ratio LC/C      |
| LPC<br>(14)     | 14:0              | 468.5      | 3.13 ± 0.56             | 3.05 ± 0.40  | 1.9         | 0.98 ± 0.22          |
|                 | 16:1              | 494.5      | 3.89 ± 0.66             | 3.74 ± 0.65  | 2.4         | 0.96 ± 0.23          |
|                 | 16:0              | 496.5      | 63.93 ± 8.77            | 58.49 ± 7.09 | <u>39.0</u> | 0.91 ± 0.17          |
|                 | 18:2              | 520.5      | 49.70 ± 6.79            | 30.31 ± 5.00 | <u>30.3</u> | 0.61 ± 0.13**        |
|                 | 18:1              | 522.5      | 16.13 ± 1.99            | 11.69 ± 0.93 | <u>9.8</u>  | 0.72 ± 0.11**        |
|                 | 18:0              | 524.5      | 9.78 ± 2.21             | 8.02 ± 1.11  | 6.0         | 0.82 ± 0.22*         |
|                 | 20:4              | 544.5      | 10.68 ± 1.70            | 8.35 ± 1.52  | 6.5         | 0.78 ± 0.19**        |
|                 | 20:3              | 546.5      | 3.12 ± 0.42             | 2.40 ± 0.37  | 1.9         | 0.77 ± 0.16**        |
|                 | 20:2              | 548.5      | 0.42 ± 0.10             | 0.34 ± 0.07  | 0.3         | 0.81 ± 0.26**        |
|                 | 20:1              | 550.5      | N.D.                    | N.D.         | -           | -                    |
|                 | 20:0              | 552.5      | 0.28 ± 0.08             | 0.23 ± 0.05  | 0.2         | 0.82 ± 0.29          |
|                 | 22:6              | 568.5      | 1.99 ± 0.36             | 1.35 ± 0.26  | 1.2         | 0.68 ± 0.18**        |
|                 | 22:5              | 570.5      | 0.46 ± 0.09             | 0.33 ± 0.07  | 0.3         | 0.72 ± 0.20**        |
|                 | 22:4              | 572.5      | 0.28 ± 0.08             | N.D.         | 0.2         | -                    |
| EtherLPC<br>(3) | O-16:0            | 480.5      | 1.10 ± 0.24             | 1.09 ± 0.21  | <u>57.6</u> | 0.99 ± 0.29          |
|                 | O-16:1 and P-16:0 | 482.5      | N.D.                    | N.D.         | -           | -                    |
|                 | O-18:0            | 510.5      | 0.81 ± 0.22             | 0.93 ± 0.18  | 42.4        | 1.15 ± 0.38          |
| PC<br>(25)      | 30:0              | 706.5      | 1.34 ± 0.27             | 1.18 ± 0.29  | 0.3         | 0.87 ± 0.28          |
|                 | 32:2              | 730.5      | 3.14 ± 0.61             | 2.00 ± 0.37  | 0.7         | 0.64 ± 0.17**        |
|                 | 32:1              | 732.5      | 5.38 ± 1.14             | 5.17 ± 0.76  | 1.2         | 0.96 ± 0.25          |
|                 | 32:0              | 734.5      | 2.83 ± 0.67             | 2.95 ± 0.48  | 0.6         | 1.04 ± 0.30          |
|                 | 34:4              | 754.5      | 1.28 ± 0.26             | 0.89 ± 0.17  | 0.3         | 0.70 ± 0.19**        |
|                 | 34:3              | 756.5      | 5.66 ± 0.78             | 3.44 ± 0.55  | 1.3         | 0.61 ± 0.13**        |
|                 | 34:2              | 758.5      | 114.82 ± 16.89          | 85.66 ± 7.79 | <u>25.8</u> | 0.75 ± 0.13**        |
|                 | 34:1              | 760.5      | 50.63 ± 8.12            | 50.21 ± 7.65 | <u>11.4</u> | 0.99 ± 0.22          |
|                 | 34:0              | 762.5      | 5.23 ± 0.86             | 5.64 ± 0.82  | 1.2         | 1.08 ± 0.24          |
|                 | 36:6              | 778.5      | 0.27 ± 0.11             | 0.17 ± 0.07  | 0.1         | 0.64 ± 0.36*         |
|                 | 36:4              | 782.5      | 53.28 ± 7.90            | 32.14 ± 5.07 | <u>12.0</u> | 0.60 ± 0.13**        |
|                 | 36:3              | 784.5      | 39.88 ± 4.45            | 26.92 ± 3.93 | <u>9.0</u>  | 0.67 ± 0.12**        |
|                 | 36:2              | 786.5      | 59.58 ± 9.46            | 43.05 ± 7.16 | <u>13.4</u> | 0.72 ± 0.17**        |
|                 | 36:1              | 788.5      | 18.04 ± 3.20            | 15.99 ± 3.07 | <u>4.0</u>  | 0.89 ± 0.23          |
|                 | 36:0              | 790.5      | 1.98 ± 0.47             | 1.74 ± 0.36  | 0.4         | 0.88 ± 0.28          |
|                 | 38:7              | 804.5      | 0.64 ± 0.17             | 0.52 ± 0.11  | 0.1         | 0.82 ± 0.28          |
|                 | 38:6              | 806.5      | 17.15 ± 2.35            | 10.09 ± 1.75 | 3.8         | 0.59 ± 0.13**        |
|                 | 38:5              | 808.5      | 12.09 ± 1.60            | 7.61 ± 1.58  | 2.7         | 0.63 ± 0.15**        |
|                 | 38:4              | 810.5      | 20.98 ± 3.81            | 16.23 ± 2.45 | <u>4.7</u>  | 0.77 ± 0.18**        |
|                 | 38:3              | 812.5      | 14.87 ± 3.13            | 13.97 ± 2.58 | 3.3         | 0.94 ± 0.26          |
|                 | 38:2              | 814.5      | 8.74 ± 1.77             | 9.78 ± 2.16  | 2.0         | 1.12 ± 0.34          |
|                 | 40:8              | 830.5      | 0.77 ± 0.18             | 0.60 ± 0.17  | 0.2         | 0.79 ± 0.29**        |
|                 | 40:7              | 832.5      | 1.26 ± 0.23             | 0.71 ± 0.21  | 0.3         | 0.57 ± 0.19**        |
|                 | 40:6              | 834.5      | 3.85 ± 0.68             | 2.77 ± 0.33  | 0.9         | 0.72 ± 0.15**        |
|                 | 40:5              | 836.5      | 1.90 ± 0.34             | 1.66 ± 0.35  | 0.4         | 0.87 ± 0.24          |
| EtherPC<br>(19) | P-32:0            | 718.5      | 1.58 ± 0.27             | 1.66 ± 0.35  | 2.1         | 1.06 ± 0.28          |
|                 | O-32:0            | 720.5      | 1.77 ± 0.32             | 2.24 ± 0.46  | 2.3         | 1.26 ± 0.34**        |
|                 | O-34:3            | 742.5      | 3.70 ± 0.67             | 2.79 ± 0.55  | 4.9         | 0.75 ± 0.20**        |
|                 | O-34:2 and P-34:1 | 744.5      | 6.27 ± 1.09             | 5.76 ± 1.01  | <u>8.3</u>  | 0.92 ± 0.23          |

|                |                   |       |                 |                 |             |                      |
|----------------|-------------------|-------|-----------------|-----------------|-------------|----------------------|
|                | O-34:1            | 746.5 | $4.67 \pm 1.04$ | $6.13 \pm 1.28$ | <u>6.1</u>  | $1.31 \pm 0.40^{**}$ |
|                | O-34:0            | 748.5 | $1.15 \pm 0.32$ | $1.54 \pm 0.33$ | 1.5         | $1.33 \pm 0.46^{**}$ |
|                | P-36:4            | 766.5 | $5.73 \pm 0.95$ | $4.24 \pm 0.84$ | <u>7.5</u>  | $0.74 \pm 0.19^{**}$ |
|                | O-36:4 and P-36:3 | 768.5 | $9.87 \pm 1.37$ | $7.03 \pm 1.32$ | <u>13.0</u> | $0.71 \pm 0.17^{**}$ |
|                | O-36:3 and P-36:2 | 770.5 | $4.91 \pm 0.91$ | $4.55 \pm 0.84$ | <u>6.5</u>  | $0.93 \pm 0.24$      |
|                | O-36:2 and P-36:1 | 772.5 | $7.65 \pm 1.30$ | $7.92 \pm 1.21$ | <u>10.1</u> | $1.03 \pm 0.24$      |
|                | P-38:5            | 792.5 | $3.10 \pm 0.52$ | $2.38 \pm 0.61$ | 4.1         | $0.77 \pm 0.23^{**}$ |
|                | O-38:5 and P-38:4 | 794.5 | $9.08 \pm 1.04$ | $7.00 \pm 1.57$ | <u>12.0</u> | $0.77 \pm 0.19^{**}$ |
|                | O-38:4            | 796.5 | $7.97 \pm 1.18$ | $7.73 \pm 1.26$ | <u>10.5</u> | $0.97 \pm 0.21$      |
|                | O-38:3            | 798.5 | $2.71 \pm 0.38$ | $4.91 \pm 0.94$ | 3.6         | $1.81 \pm 0.43^{**}$ |
|                | O-40:6 and P-40:5 | 820.5 | $1.84 \pm 0.34$ | $1.82 \pm 0.39$ | 2.4         | $0.99 \pm 0.28$      |
|                | O-40:5 and P-40:4 | 822.5 | $1.61 \pm 0.26$ | $2.01 \pm 0.54$ | 2.1         | $1.25 \pm 0.39^{**}$ |
|                | O-40:4            | 824.5 | $1.18 \pm 0.29$ | $1.77 \pm 0.54$ | 1.6         | $1.50 \pm 0.59^{**}$ |
|                | O-42:6            | 848.5 | $0.56 \pm 0.14$ | $0.54 \pm 0.19$ | 0.7         | $0.97 \pm 0.41$      |
|                | O-42:5            | 850.5 | $0.54 \pm 0.16$ | $0.94 \pm 0.25$ | 0.7         | $1.75 \pm 0.71^{**}$ |
| LPE<br>(9)     | 14:0              | 426.5 | N.D.            | N.D.            | -           | -                    |
|                | 16:1              | 452.5 | N.D.            | N.D.            | -           | -                    |
|                | 16:0              | 454.5 | $0.48 \pm 0.21$ | $0.44 \pm 0.22$ | 4.9         | $0.91 \pm 0.60$      |
|                | 18:2              | 478.5 | $4.29 \pm 1.45$ | $2.49 \pm 1.06$ | <u>43.6</u> | $0.58 \pm 0.31^{**}$ |
|                | 18:1              | 480.5 | $0.80 \pm 0.34$ | $0.49 \pm 0.23$ | 8.1         | $0.62 \pm 0.39^{**}$ |
|                | 18:0              | 482.5 | $0.55 \pm 0.30$ | $0.48 \pm 0.30$ | 5.6         | $0.87 \pm 0.72$      |
|                | 20:4              | 502.5 | $2.39 \pm 0.61$ | $1.79 \pm 0.66$ | <u>24.3</u> | $0.75 \pm 0.33^{**}$ |
|                | 22:6              | 526.5 | $1.13 \pm 0.44$ | $0.80 \pm 0.42$ | 11.5        | $0.71 \pm 0.46^*$    |
|                | 22:5              | 528.5 | $0.20 \pm 0.10$ | N.D.            | 2.1         | -                    |
| PE<br>(13)     | 34:2              | 716.5 | $2.67 \pm 0.55$ | $2.65 \pm 1.06$ | 7.2         | $0.99 \pm 0.45$      |
|                | 34:1              | 718.5 | $1.17 \pm 0.40$ | $1.13 \pm 0.50$ | 3.2         | $0.97 \pm 0.54$      |
|                | 36:4              | 740.5 | $3.59 \pm 0.67$ | $3.01 \pm 1.34$ | <u>9.7</u>  | $0.84 \pm 0.40$      |
|                | 36:3              | 742.5 | $3.16 \pm 0.78$ | $1.84 \pm 0.85$ | <u>8.6</u>  | $0.58 \pm 0.30^{**}$ |
|                | 36:2              | 744.5 | $5.83 \pm 1.45$ | $3.63 \pm 1.00$ | <u>15.8</u> | $0.62 \pm 0.23^{**}$ |
|                | 36:1              | 746.5 | $1.67 \pm 0.60$ | $1.45 \pm 0.62$ | 4.5         | $0.86 \pm 0.48$      |
|                | 38:6              | 764.5 | $4.23 \pm 1.67$ | $2.74 \pm 0.96$ | <u>11.4</u> | $0.65 \pm 0.34^{**}$ |
|                | 38:5              | 766.5 | $2.80 \pm 0.71$ | $1.95 \pm 0.93$ | 7.6         | $0.70 \pm 0.37^{**}$ |
|                | 38:4              | 768.5 | $7.23 \pm 1.95$ | $4.28 \pm 1.85$ | <u>19.6</u> | $0.59 \pm 0.30^{**}$ |
|                | 38:3              | 770.5 | $1.55 \pm 0.52$ | $0.96 \pm 0.37$ | 4.2         | $0.62 \pm 0.32^{**}$ |
|                | 40:7              | 790.5 | $0.53 \pm 0.24$ | $0.30 \pm 0.17$ | 1.4         | $0.55 \pm 0.40^{**}$ |
|                | 40:6              | 792.5 | $1.72 \pm 0.69$ | $1.09 \pm 0.49$ | 4.7         | $0.63 \pm 0.38^{**}$ |
|                | 40:5              | 794.5 | $0.77 \pm 0.29$ | $0.42 \pm 0.19$ | 2.1         | $0.54 \pm 0.33^{**}$ |
| EtherPE<br>(7) | O-36:4 and P-36:3 | 726.5 | $0.54 \pm 0.23$ | $0.41 \pm 0.27$ | 12.8        | $0.76 \pm 0.60$      |
|                | P-36:2            | 728.5 | $1.41 \pm 0.42$ | $1.45 \pm 0.56$ | <u>33.4</u> | $1.03 \pm 0.51$      |
|                | O-36:2 and P-36:1 | 730.5 | $0.28 \pm 0.13$ | $0.30 \pm 0.15$ | 6.7         | $1.06 \pm 0.75$      |
|                | O-38:5            | 752.5 | $0.94 \pm 0.28$ | $0.81 \pm 0.45$ | <u>22.4</u> | $0.86 \pm 0.54$      |
|                | O-38:4 and P-38:3 | 754.5 | $0.77 \pm 0.34$ | $0.62 \pm 0.22$ | <u>18.4</u> | $0.81 \pm 0.46$      |
|                | P-38:1            | 758.5 | $0.27 \pm 0.10$ | $0.16 \pm 0.08$ | 6.3         | $0.61 \pm 0.38^{**}$ |
|                | P-40:7            | 774.5 | N.D.            | N.D.            | -           | -                    |
| LPG<br>(6)     | 14:0              | 455.5 | N.D.            | N.D.            | -           | -                    |
|                | 16:1              | 481.5 | N.D.            | N.D.            | -           | -                    |

|        |            |       |                   |                   |             |                                        |
|--------|------------|-------|-------------------|-------------------|-------------|----------------------------------------|
|        | 16:0       | 483.5 | N.D.              | N.D.              | -           | -                                      |
|        | 18:2       | 507.5 | $0.18 \pm 0.03$   | $0.17 \pm 0.04$   | 42.0        | $0.95 \pm 0.27$                        |
|        | 18:1       | 509.5 | $0.24 \pm 0.06$   | $0.17 \pm 0.05$   | <u>58.0</u> | $0.69 \pm 0.26^{**}$                   |
|        | 18:0       | 511.5 | N.D.              | N.D.              | -           | -                                      |
| PG     | 16:0/16:0  | 721.5 | $0.34 \pm 0.02$   | N.D.              | <u>100</u>  | -                                      |
| (7)    | 16:0/18:1  | 747.5 | N.D.              | N.D.              | -           | -                                      |
|        | 18:0/16:1  | 747.5 | N.D.              | N.D.              | -           | -                                      |
|        | 18:1/18:2  | 771.5 | N.D.              | N.D.              | -           | -                                      |
|        | 18:0/18:2  | 773.5 | N.D.              | N.D.              | -           | -                                      |
|        | 18:1/18:1  | 773.5 | N.D.              | N.D.              | -           | -                                      |
|        | 18:0/18:1  | 775.5 | N.D.              | N.D.              | -           | -                                      |
|        | 16:0/22:5  | 795.5 | N.D.              | N.D.              | -           | -                                      |
| LPI    | 18:2       | 595.5 | $2.75 \pm 0.81$   | $1.77 \pm 0.61$   | <u>35.8</u> | $0.64 \pm 0.29^{**}$                   |
| (5)    | 18:1       | 597.5 | $0.87 \pm 0.13$   | $0.66 \pm 0.15$   | 11.3        | $0.76 \pm 0.21^{**}$                   |
|        | 18:0       | 599.5 | $0.49 \pm 0.18$   | $0.35 \pm 0.11$   | 6.4         | $0.71 \pm 0.35^*$                      |
|        | 20:4       | 619.5 | $2.95 \pm 0.22$   | $2.71 \pm 0.66$   | <u>38.5</u> | $0.92 \pm 0.23$                        |
|        | 20:3       | 621.5 | $0.61 \pm 0.16$   | $0.53 \pm 0.15$   | 8.0         | $0.86 \pm 0.34$                        |
| PI     | 16:0/16:0  | 809.5 | N.D.              | N.D.              | -           | -                                      |
| (13)   | 16:1/18:1  | 833.5 | N.D.              | N.D.              | -           | -                                      |
|        | 18:1/16:0  | 835.5 | $4.22 \pm 1.31$   | $4.79 \pm 2.33$   | 4.7         | $1.13 \pm 0.65$                        |
|        | 16:0/20:5  | 855.5 | $0.33 \pm 0.10$   | $0.31 \pm 0.19$   | 0.4         | $0.94 \pm 0.65$                        |
|        | 18:1/18:2  | 859.5 | $2.22 \pm 1.18$   | $0.69 \pm 0.18$   | 2.5         | <b><math>0.31 \pm 0.18^{**}</math></b> |
|        | 18:0/18:2  | 861.5 | $14.60 \pm 2.60$  | $7.80 \pm 2.42$   | <u>16.3</u> | $0.53 \pm 0.19^{**}$                   |
|        | 18:1/18:1  | 861.5 | $6.08 \pm 2.14$   | $3.19 \pm 1.20$   | 6.8         | $0.52 \pm 0.27^{**}$                   |
|        | 18:1/18:0  | 863.5 | $5.02 \pm 1.28$   | $2.78 \pm 0.81$   | 5.6         | $0.55 \pm 0.22^{**}$                   |
|        | 22:6/16:0  | 881.5 | N.D.              | N.D.              | -           | -                                      |
|        | 18:0/20:4  | 885.5 | $47.32 \pm 6.60$  | $23.13 \pm 3.76$  | <u>53.0</u> | <b><math>0.49 \pm 0.10^{**}</math></b> |
|        | 18:0/20:3  | 887.5 | $8.88 \pm 1.48$   | $6.01 \pm 1.04$   | 9.9         | $0.68 \pm 0.16^{**}$                   |
|        | 18:0/20:2  | 889.5 | $0.69 \pm 0.36$   | $0.25 \pm 0.05$   | 0.8         | <b><math>0.36 \pm 0.20^{**}</math></b> |
|        | 18:1/22:6  | 907.5 | N.D.              | N.D.              | -           | -                                      |
| SM     | d18:2/14:0 | 673.5 | $1.17 \pm 0.36$   | $0.72 \pm 0.32$   | 0.4         | $0.62 \pm 0.33^{**}$                   |
| (8)    | d18:1/16:0 | 703.5 | $86.13 \pm 12.41$ | $84.28 \pm 12.77$ | <u>29.6</u> | $0.98 \pm 0.20$                        |
|        | d18:2/18:0 | 729.5 | $7.55 \pm 1.17$   | $7.67 \pm 1.30$   | 2.6         | $1.02 \pm 0.23$                        |
|        | d18:1/18:0 | 731.5 | $17.41 \pm 3.02$  | $19.88 \pm 4.75$  | 6.0         | $1.14 \pm 0.34$                        |
|        | d18:0/20:2 | 757.5 | $12.68 \pm 2.25$  | $9.85 \pm 2.31$   | 4.4         | $0.78 \pm 0.23^{**}$                   |
|        | d18:1/22:1 | 785.5 | $80.94 \pm 13.97$ | $63.29 \pm 13.99$ | <u>27.9</u> | $0.78 \pm 0.22^{**}$                   |
|        | d18:1/24:1 | 813.5 | $60.33 \pm 12.49$ | $67.31 \pm 15.72$ | <u>20.8</u> | $1.12 \pm 0.35$                        |
|        | d18:1/24:0 | 815.5 | $24.38 \pm 5.74$  | $24.69 \pm 6.95$  | 8.4         | $1.01 \pm 0.37$                        |
| Cer    | d16:1/24:0 | 622.5 | $1.17 \pm 0.49$   | $0.05 \pm 0.01$   | 2.5         | <b><math>0.05 \pm 0.02^{**}</math></b> |
| (8)    | d18:1/22:0 | 622.5 | $7.68 \pm 0.95$   | $0.91 \pm 0.14$   | <u>16.4</u> | <b><math>0.12 \pm 0.02^{**}</math></b> |
|        | d18:0/22:0 | 624.5 | $0.38 \pm 0.20$   | N.D.              | 0.8         | -                                      |
|        | d18:1/24:1 | 648.5 | $8.20 \pm 2.79$   | $1.11 \pm 0.11$   | <u>17.5</u> | <b><math>0.14 \pm 0.05^{**}</math></b> |
|        | d18:2/24:0 | 648.5 | $4.69 \pm 0.78$   | $0.35 \pm 0.13$   | 10.0        | <b><math>0.07 \pm 0.03^{**}</math></b> |
|        | d18:1/24:0 | 650.5 | $24.36 \pm 5.85$  | $2.14 \pm 0.74$   | <u>52.0</u> | <b><math>0.09 \pm 0.04^{**}</math></b> |
|        | d18:1/26:0 | 678.5 | $0.21 \pm 0.15$   | N.D.              | 0.5         | -                                      |
|        | d20:1/24:0 | 678.5 | $0.20 \pm 0.16$   | N.D.              | 0.4         | -                                      |
| HexCer | d18:1/22:0 | 784.5 | $3.86 \pm 1.92$   | $2.10 \pm 0.68$   | <u>33.3</u> | $0.55 \pm 0.32^{**}$                   |
| (3)    | d18:1/24:1 | 810.5 | $3.32 \pm 1.68$   | $2.52 \pm 1.02$   | 28.7        | $0.76 \pm 0.49$                        |
|        | d18:1/24:0 | 812.5 | $4.39 \pm 2.50$   | $3.20 \pm 2.09$   | <u>37.9</u> | $0.73 \pm 0.63$                        |
| DG     | 32:1       | 584.5 | $0.86 \pm 0.63$   | $0.48 \pm 0.32$   | 2.7         | $0.56 \pm 0.55^*$                      |
| (10)   | 32:0       | 586.5 | $2.66 \pm 2.57$   | $1.62 \pm 0.80$   | 8.5         | $0.61 \pm 0.66$                        |
|        | 34:2       | 610.5 | $2.75 \pm 1.50$   | $2.26 \pm 1.06$   | 8.8         | $0.82 \pm 0.59$                        |
|        | 34:1       | 612.5 | $4.50 \pm 2.33$   | $4.83 \pm 2.10$   | <u>14.4</u> | $1.07 \pm 0.72$                        |

|            |      |       |                    |                    |             |                                        |
|------------|------|-------|--------------------|--------------------|-------------|----------------------------------------|
| TG<br>(42) | 34:0 | 614.5 | $1.22 \pm 0.73$    | $1.04 \pm 0.58$    | 3.9         | $0.85 \pm 0.70$                        |
|            | 36:4 | 634.5 | $0.30 \pm 0.19$    | N.D.               | 1.0         | -                                      |
|            | 36:3 | 636.5 | $5.99 \pm 2.27$    | $4.92 \pm 2.35$    | <u>19.2</u> | $0.82 \pm 0.50^*$                      |
|            | 36:2 | 638.5 | $11.75 \pm 3.47$   | $12.18 \pm 6.29$   | <u>37.6</u> | $1.04 \pm 0.62$                        |
|            | 36:1 | 640.5 | $0.89 \pm 0.25$    | $1.19 \pm 0.65$    | 2.9         | $1.33 \pm 0.82$                        |
|            | 36:0 | 642.5 | $0.33 \pm 0.03$    | $0.31 \pm 0.11$    | 1.1         | $0.96 \pm 0.35$                        |
|            | 40:1 | 710.5 | $0.09 \pm 0.04$    | $0.21 \pm 0.10$    | 0.0         | <b><math>2.26 \pm 1.41^*</math></b>    |
|            | 40:0 | 712.5 | $0.16 \pm 0.11$    | $0.79 \pm 0.29$    | 0.1         | <b><math>5.09 \pm 3.98^{**}</math></b> |
|            | 42:2 | 736.5 | N.D.               | $0.42 \pm 0.15$    | -           | -                                      |
|            | 42:1 | 738.5 | $0.10 \pm 0.06$    | $0.68 \pm 0.22$    | 0.1         | <b><math>6.53 \pm 4.55^{**}</math></b> |
|            | 42:0 | 740.5 | $0.47 \pm 0.26$    | $1.28 \pm 0.34$    | 0.3         | <b><math>2.73 \pm 1.69^{**}</math></b> |
|            | 44:2 | 764.5 | $0.11 \pm 0.02$    | $0.48 \pm 0.24$    | 0.1         | <b><math>4.22 \pm 2.17^*</math></b>    |
|            | 44:1 | 766.5 | $0.66 \pm 0.45$    | $0.98 \pm 0.33$    | 0.4         | $1.48 \pm 1.13$                        |
|            | 44:0 | 768.5 | $1.28 \pm 0.60$    | $1.40 \pm 0.74$    | 0.7         | $1.10 \pm 0.78$                        |
|            | 46:3 | 790.5 | $0.30 \pm 0.06$    | $0.87 \pm 0.44$    | 0.2         | <b><math>2.93 \pm 1.58^{**}</math></b> |
|            | 46:2 | 792.5 | $1.09 \pm 0.69$    | $1.41 \pm 1.01$    | 0.6         | $1.29 \pm 1.23$                        |
|            | 46:1 | 794.5 | $2.46 \pm 1.46$    | $3.59 \pm 0.66$    | 1.3         | $1.46 \pm 0.91$                        |
|            | 46:0 | 796.5 | $2.30 \pm 1.33$    | $2.19 \pm 1.08$    | 1.2         | $0.95 \pm 0.72$                        |
|            | 48:4 | 816.5 | $0.11 \pm 0.03$    | $0.15 \pm 0.09$    | 0.1         | $1.39 \pm 0.92$                        |
|            | 48:3 | 818.5 | $1.50 \pm 0.32$    | $3.17 \pm 0.73$    | 0.8         | <b><math>2.11 \pm 0.67^{**}</math></b> |
|            | 48:2 | 820.5 | $2.78 \pm 1.56$    | $4.03 \pm 1.84$    | 1.5         | $1.45 \pm 1.05$                        |
|            | 48:1 | 822.5 | $4.95 \pm 1.50$    | $8.10 \pm 4.50$    | <u>2.7</u>  | $1.64 \pm 1.04$                        |
|            | 48:0 | 824.5 | $3.93 \pm 2.35$    | $10.08 \pm 8.06$   | 2.1         | <b><math>2.56 \pm 2.55^*</math></b>    |
|            | 50:5 | 842.5 | $0.18 \pm 0.10$    | $0.27 \pm 0.10$    | 0.1         | $1.53 \pm 1.06$                        |
|            | 50:4 | 844.5 | $0.67 \pm 0.20$    | $0.78 \pm 0.28$    | 0.4         | $1.15 \pm 0.54$                        |
|            | 50:3 | 846.5 | $10.07 \pm 5.11$   | $12.02 \pm 5.94$   | <u>5.4</u>  | $1.19 \pm 0.85$                        |
|            | 50:2 | 848.5 | $11.31 \pm 2.66$   | $28.22 \pm 7.01$   | <u>6.1</u>  | <b><math>2.50 \pm 0.85^{**}</math></b> |
|            | 50:1 | 850.5 | $1.20 \pm 0.70$    | $2.09 \pm 0.43$    | 0.6         | $1.75 \pm 1.07$                        |
|            | 50:0 | 852.5 | $3.09 \pm 1.08$    | $4.86 \pm 2.51$    | 1.7         | $1.57 \pm 0.98$                        |
|            | 52:6 | 868.5 | $0.28 \pm 0.18$    | $0.90 \pm 0.49$    | 0.1         | <b><math>3.23 \pm 2.76^{**}</math></b> |
|            | 52:5 | 870.5 | $5.15 \pm 0.93$    | $12.18 \pm 4.96$   | <u>2.8</u>  | <b><math>2.37 \pm 1.05^{**}</math></b> |
|            | 52:4 | 872.5 | $7.41 \pm 0.35$    | $20.65 \pm 8.27$   | <u>4.0</u>  | <b><math>2.79 \pm 1.12^{**}</math></b> |
|            | 52:3 | 874.5 | $48.81 \pm 13.30$  | $59.75 \pm 20.62$  | <u>26.2</u> | $1.22 \pm 0.54$                        |
|            | 52:2 | 876.5 | $3.59 \pm 0.43$    | $5.21 \pm 2.40$    | 1.9         | $1.45 \pm 0.69$                        |
|            | 52:1 | 878.5 | $3.99 \pm 1.36$    | $5.12 \pm 2.12$    | 2.1         | $1.28 \pm 0.69$                        |
|            | 52:0 | 880.5 | $0.29 \pm 0.11$    | $1.12 \pm 0.60$    | 0.2         | <b><math>3.84 \pm 2.49</math></b>      |
|            | 54:7 | 894.5 | $0.65 \pm 0.26$    | $2.59 \pm 1.48$    | 0.4         | <b><math>3.97 \pm 2.78^{**}</math></b> |
|            | 54:6 | 896.5 | $5.50 \pm 2.07$    | $11.73 \pm 5.21$   | <u>3.0</u>  | <b><math>2.13 \pm 1.24^{**}</math></b> |
|            | 54:5 | 898.5 | $11.98 \pm 4.16$   | $32.61 \pm 15.39$  | <u>6.4</u>  | <b><math>2.72 \pm 1.59^{**}</math></b> |
|            | 54:4 | 900.5 | $18.56 \pm 7.69$   | $34.15 \pm 8.54$   | <u>10.0</u> | $1.84 \pm 0.89^{**}$                   |
|            | 54:3 | 902.5 | $23.18 \pm 13.45$  | $33.10 \pm 10.91$  | <u>12.5</u> | $1.43 \pm 0.95$                        |
|            | 54:2 | 904.5 | $5.23 \pm 1.40$    | $8.67 \pm 0.66$    | <u>2.8</u>  | $1.66 \pm 0.46$                        |
|            | 54:1 | 906.5 | $0.41 \pm 0.19$    | $0.79 \pm 0.18$    | 0.2         | $1.95 \pm 1.02^{**}$                   |
|            | 54:0 | 908.5 | $0.12 \pm 0.05$    | $0.26 \pm 0.20$    | 0.1         | <b><math>2.23 \pm 1.98</math></b>      |
|            | 56:8 | 920.5 | $0.40 \pm 0.13$    | $1.15 \pm 0.48$    | 0.2         | <b><math>2.87 \pm 1.54^{**}</math></b> |
|            | 56:7 | 922.5 | $0.53 \pm 0.19$    | $0.93 \pm 0.29$    | 0.3         | $1.73 \pm 0.82^{**}$                   |
|            | 56:6 | 924.5 | $0.67 \pm 0.15$    | $1.44 \pm 0.30$    | 0.4         | <b><math>2.17 \pm 0.66^{**}</math></b> |
|            | 56:5 | 926.5 | $0.50 \pm 0.12$    | $0.99 \pm 0.35$    | 0.3         | $1.96 \pm 0.83^{**}$                   |
| CE<br>(9)  | 16:1 | 640.5 | $4.54 \pm 1.45$    | $3.28 \pm 0.43$    | 1.1         | $0.72 \pm 0.25^*$                      |
|            | 16:0 | 642.5 | $3.21 \pm 0.30$    | $1.96 \pm 0.67$    | 0.8         | $0.61 \pm 0.22^{**}$                   |
|            | 18:3 | 664.5 | $18.65 \pm 2.28$   | $9.09 \pm 0.74$    | 4.5         | <b><math>0.49 \pm 0.07^{**}</math></b> |
|            | 18:2 | 666.5 | $250.34 \pm 84.49$ | $118.15 \pm 40.00$ | <u>60.5</u> | <b><math>0.47 \pm 0.23^{**}</math></b> |

|      |       |               |              |             |                      |
|------|-------|---------------|--------------|-------------|----------------------|
| 18:1 | 668.5 | 55.74 ± 15.51 | 28.44 ± 8.21 | <u>13.5</u> | 0.51 ± 0.20**        |
| 20:5 | 688.5 | 6.92 ± 3.13   | 3.45 ± 0.59  | 1.7         | <b>0.50 ± 0.24*</b>  |
| 20:4 | 690.5 | 49.64 ± 15.05 | 27.52 ± 8.07 | <u>12.0</u> | 0.55 ± 0.23**        |
| 20:3 | 692.5 | 9.63 ± 2.31   | 5.05 ± 1.79  | 2.3         | 0.52 ± 0.22**        |
| 22:6 | 714.5 | 15.13 ± 2.82  | 6.01 ± 1.91  | 3.7         | <b>0.40 ± 0.15**</b> |

\*  $p < 0.05$ ; \*\*  $p < 0.01$ .

Table S2. Isomeric structure of PC, PE, and TG identified from CID spectra.

| Saliva |                   |             |         |       |                   |                |         |
|--------|-------------------|-------------|---------|-------|-------------------|----------------|---------|
| Class  | Molecular species | Acyl chains | $m/z$   | Class | Molecular species | Acyl chains    | $m/z$   |
| PC     | 32:1              | 16:0/16:1   | 732.554 | 48:3  |                   | 16:1_16:1_16:1 | 818.723 |
|        |                   | 14:0/18:1   | 732.554 |       |                   | 18:1_16:1_14:1 | 818.723 |
|        | 34:1              | 16:0/18:1   | 760.585 |       |                   | 18:2_16:0_14:1 | 818.723 |
|        |                   | 18:0/16:1   | 760.585 |       |                   | 18:2_16:1_14:0 | 818.723 |
|        | 36:3              | 18:1/18:2   | 784.585 |       |                   | 18:2_18:1_12:0 | 818.723 |
|        |                   | 20:3/16:0   | 784.585 | 48:2  |                   | 16:1_16:1_16:0 | 820.739 |
|        | 36:2              | 18:0/18:2   | 786.601 |       |                   | 18:0_16:1_14:1 | 820.739 |
|        |                   | 18:1/18:1   | 786.601 |       |                   | 18:1_16:0_14:1 | 820.739 |
|        | 38:4              | 18:0/20:4   | 810.601 |       |                   | 18:1_16:1_14:0 | 820.739 |
|        |                   | 16:0/22:4   | 810.601 |       |                   | 18:1_18:1_12:0 | 820.739 |
|        | 38:2              | 20:0/18:2   | 814.632 |       |                   | 18:2_16:0_14:0 | 820.739 |
|        |                   | 16:0/22:2   | 814.632 | 48:1  |                   | 18:2_18:0_12:0 | 820.739 |
|        |                   | 18:0/20:2   | 814.632 |       |                   | 16:1_16:0_16:0 | 822.755 |
|        | 42:0              | 24:0/18:0   | 874.726 |       |                   | 18:0_16:1_14:0 | 822.755 |
|        |                   | 26:0/16:0   | 874.726 |       |                   | 18:1_16:0_14:0 | 822.755 |
|        | 44:1              | 24:0/18:1   | 900.742 |       | 48:0              | 16:0_16:0_16:0 | 824.770 |
|        |                   | 18:0/24:1   | 900.742 |       |                   | 18:0_16:0_14:0 | 824.770 |
| PE     | 30:1              | 14:0/16:1   | 662.476 | 50:3  |                   | 18:1_16:1_16:1 | 846.755 |
|        |                   | 16:0/14:1   | 662.476 |       |                   | 18:2_16:1_16:0 | 846.755 |
|        |                   | 18:1/12:0   | 662.476 |       |                   | 18:2_18:1_14:0 | 846.755 |
|        | 30:0              | 16:0/14:0   | 664.491 | 50:2  |                   | 18:0_16:1_16:1 | 848.770 |
|        |                   | 18:0/12:0   | 664.491 |       |                   | 18:1_16:1_16:0 | 848.770 |
|        | 32:2              | 16:1/16:1   | 688.491 |       |                   | 18:1_18:1_14:0 | 848.770 |
|        |                   | 14:0/18:2   | 688.491 |       |                   | 18:2_16:0_16:0 | 848.770 |
|        |                   | 18:1/14:1   | 688.491 |       |                   | 18:2_18:0_14:0 | 848.770 |
|        | 32:1              | 16:0/16:1   | 690.507 | 50:1  |                   | 18:1_16:0_16:0 | 850.786 |
|        |                   | 14:0/18:1   | 690.507 |       |                   | 18:1_18:0_14:0 | 850.786 |
|        | 34:3              | 16:1/18:2   | 714.507 | 50:0  |                   | 18:0_16:0_16:0 | 852.802 |
|        |                   | 16:0/18:3   | 714.507 |       |                   | 18:0_18:0_14:0 | 852.802 |
|        |                   | 20:3/14:0   | 714.507 | 52:6  |                   | 18:3_18:2_16:1 | 868.739 |
|        | 34:2              | 16:0/18:2   | 716.523 |       |                   | 18:3_18:3_16:0 | 868.739 |
|        |                   | 16:1/18:1   | 716.523 | 52:5  |                   | 18:2_18:2_16:1 | 870.755 |
|        | 34:1              | 16:0/18:1   | 718.538 |       |                   | 18:3_18:1_16:1 | 870.755 |
|        |                   | 18:0/16:1   | 718.538 |       |                   | 18:3_18:2_16:0 | 870.755 |
|        | 36:3              | 18:1/18:2   | 742.538 |       |                   | 18:2_18:1_16:1 | 872.770 |

|      |      |                |         |      |  |                |         |
|------|------|----------------|---------|------|--|----------------|---------|
|      |      | 16:0/20:3      | 742.538 |      |  | 18:2_18:2_16:0 | 872.770 |
|      |      | 18:3/18:0      | 742.538 | 52:3 |  | 18:1_18:1_16:1 | 874.786 |
| 36:2 |      | 18:0/18:2      | 744.554 |      |  | 18:2_18:0_16:1 | 874.786 |
|      |      | 18:1/18:1      | 744.554 |      |  | 18:2_18:1_16:0 | 874.786 |
|      |      | 16:0/20:2      | 744.554 | 52:2 |  | 18:1_18:0_16:1 | 876.802 |
| 36:1 |      | 18:0/18:1      | 746.569 |      |  | 18:1_18:1_16:0 | 876.802 |
|      |      | 20:1/16:0      | 746.569 |      |  | 18:2_18:0_16:0 | 876.802 |
| 38:5 |      | 16:0/22:5      | 766.538 | 52:1 |  | 18:1_18:0_16:0 | 878.817 |
|      |      | 18:1/20:4      | 766.538 |      |  | 18:0_18:0_16:0 | 880.833 |
|      |      | 20:3/18:2      | 766.538 | 54:7 |  | 18:3_18:2_18:2 | 894.755 |
| 38:2 |      | 20:0/18:2      | 772.585 |      |  | 18:3_18:3_18:1 | 894.755 |
|      |      | 20:1/18:1      | 772.585 |      |  | 20:4_18:2_16:1 | 894.755 |
|      |      | 18:0/20:2      | 772.585 | 54:6 |  | 18:2_18:2_18:2 | 896.770 |
|      |      | 22:2/16:0      | 772.585 |      |  | 18:3_18:2_18:1 | 896.770 |
| TG   | 40:0 | 14:0_14:0_12:0 | 712.645 | 54:5 |  | 18:2_18:2_18:1 | 898.786 |
|      |      | 16:0_12:0_12:0 | 712.645 |      |  | 18:3_18:1_18:1 | 898.786 |
| 42:1 |      | 14:1_14:0_14:0 | 738.661 | 54:4 |  | 18:2_18:1_18:1 | 900.802 |
|      |      | 16:0_14:1_12:0 | 738.661 |      |  | 18:2_18:2_18:0 | 900.802 |
|      |      | 16:1_14:0_12:0 | 738.661 |      |  | 18:3_18:1_18:0 | 900.802 |
|      |      | 18:1_12:0_12:0 | 738.661 |      |  | 20:3_18:1_16:0 | 900.802 |
| 42:0 |      | 14:0_14:0_14:0 | 740.676 | 54:3 |  | 18:1_18:1_18:1 | 902.817 |
|      |      | 16:0_14:0_12:0 | 740.676 |      |  | 18:2_18:1_18:0 | 902.817 |
|      |      | 18:0_12:0_12:0 | 740.676 | 54:0 |  | 18:1_18:0_18:0 | 906.849 |
| 44:3 |      | 16:1_14:1_14:1 | 762.661 |      |  | 20:0_18:0_16:0 | 906.849 |
|      |      | 18:2_14:1_12:0 | 762.661 | 56:8 |  | 20:4_18:2_18:2 | 920.770 |
| 44:2 |      | 16:0_14:1_14:1 | 764.676 |      |  | 20:4_20:4_16:0 | 920.770 |
|      |      | 18:1_14:1_12:0 | 764.676 | 56:7 |  | 20:3_18:2_18:2 | 922.786 |
|      |      | 18:2_14:0_12:0 | 764.676 |      |  | 20:3_18:3_18:1 | 922.786 |
| 44:1 |      | 16:0_14:1_14:0 | 766.692 |      |  | 20:3_20:3_16:1 | 922.786 |
|      |      | 16:1_14:0_14:0 | 766.692 |      |  | 20:4_18:2_18:1 | 922.786 |
|      |      | 18:0_14:1_12:0 | 766.692 | 56:5 |  | 20:1_18:3_18:1 | 926.817 |
|      |      | 18:1_14:0_12:0 | 766.692 |      |  | 20:2_18:2_18:1 | 926.817 |
| 44:0 |      | 16:0_14:0_14:0 | 768.708 |      |  | 20:2_18:3_18:0 | 926.817 |
|      |      | 16:0_16:0_12:0 | 768.708 |      |  | 20:3_18:1_18:1 | 926.817 |
|      |      | 18:0_14:0_12:0 | 768.708 |      |  | 20:3_18:2_18:0 | 926.817 |
| 46:3 |      | 16:1_16:1_14:1 | 790.692 |      |  | 20:3_20:2_16:0 | 926.817 |
|      |      | 18:1_14:1_14:1 | 790.692 | 56:4 |  | 20:0_18:2_18:2 | 928.833 |
|      |      | 18:2_14:1_14:0 | 790.692 |      |  | 20:1_18:2_18:1 | 928.833 |
|      |      | 18:2_16:1_12:0 | 790.692 |      |  | 20:2_18:1_18:1 | 928.833 |
| 46:2 |      | 16:1_16:0_14:1 | 792.708 | 56:3 |  | 20:0_18:2_18:1 | 930.849 |
|      |      | 16:1_16:1_14:0 | 792.708 |      |  | 20:1_18:1_18:1 | 930.849 |
|      |      | 18:1_14:1_14:0 | 792.708 | 56:2 |  | 20:0_18:1_18:1 | 932.864 |
|      |      | 18:1_16:1_12:0 | 792.708 |      |  | 20:1_18:1_18:0 | 932.864 |
|      |      | 18:2_14:0_14:0 | 792.708 |      |  | 20:1_20:0_16:1 | 932.864 |
|      |      | 18:2_16:0_12:0 | 792.708 |      |  | 20:1_20:1_16:0 | 932.864 |

|      |                |         |      |                |         |
|------|----------------|---------|------|----------------|---------|
| 46:1 | 16:1_16:0_14:0 | 794.723 |      | 22:0_18:1_16:1 | 932.864 |
|      | 18:0_16:1_12:0 | 794.723 |      | 22:0_18:2_16:0 | 932.864 |
|      | 18:1_14:0_14:0 | 794.723 |      | 24:0_16:1_16:1 | 932.864 |
|      | 18:1_16:0_12:0 | 794.723 | 58:8 | 20:4_20:4_18:0 | 948.801 |
| 46:0 | 16:0_16:0_14:0 | 796.739 |      | 22:5_18:2_18:1 | 948.801 |
|      | 18:0_14:0_14:0 | 796.739 |      | 22:6_18:1_18:1 | 948.801 |
|      | 18:0_16:0_12:0 | 796.739 |      |                |         |

## Plasma

| Class | Molecular species | Acyl chains | <i>m/z</i> | Class | Molecular species | Acyl chains    | <i>m/z</i> |
|-------|-------------------|-------------|------------|-------|-------------------|----------------|------------|
| PC    | 32:2              | 14:0/18:2   | 730.538    |       |                   | 18:2_14:1_14:0 | 790.692    |
|       |                   | 16:1/16:1   | 730.538    |       |                   | 18:2_16:1_12:0 | 790.692    |
|       | 32:1              | 14:0/18:1   | 732.554    | 46:2  |                   | 16:1_16:0_14:1 | 792.708    |
|       |                   | 16:0/16:1   | 732.554    |       |                   | 16:1_16:1_14:0 | 792.708    |
|       | 34:4              | 14:0/20:4   | 754.538    |       |                   | 18:1_14:1_14:0 | 792.708    |
|       |                   | 16:2/18:2   | 754.538    |       |                   | 18:1_16:1_12:0 | 792.708    |
|       | 34:3              | 14:0/20:3   | 756.554    |       |                   | 18:2_14:0_14:0 | 792.708    |
|       |                   | 16:0/18:3   | 756.554    |       |                   | 18:2_16:0_12:0 | 792.708    |
|       |                   | 16:1/18:2   | 756.554    | 46:1  |                   | 16:0_16:0_14:1 | 794.723    |
|       | 36:4              | 16:0/20:4   | 782.569    |       |                   | 16:1_16:0_14:0 | 794.723    |
|       |                   | 18:2/18:2   | 782.569    |       |                   | 18:1_14:0_14:0 | 794.723    |
|       | 36:3              | 16:0/20:3   | 784.585    |       |                   | 18:1_16:0_12:0 | 794.723    |
|       |                   | 18:1/18:2   | 784.585    | 48:4  |                   | 18:2_16:1_14:1 | 816.708    |
|       | 36:2              | 16:0/20:2   | 786.601    |       |                   | 18:2_18:2_12:0 | 816.708    |
|       |                   | 18:0/18:2   | 786.601    |       |                   | 18:3_18:1_12:0 | 816.708    |
|       |                   | 18:1/18:1   | 786.601    | 48:3  |                   | 16:1_16:1_16:1 | 818.723    |
|       | 36:1              | 16:0/20:1   | 788.616    |       |                   | 18:1_16:1_14:1 | 818.723    |
|       |                   | 18:0/18:1   | 788.616    |       |                   | 18:2_16:0_14:1 | 818.723    |
|       | 38:7              | 16:1/22:6   | 804.554    |       |                   | 18:2_16:1_14:0 | 818.723    |
|       |                   | 18:2/20:5   | 804.554    |       |                   | 18:2_18:1_12:0 | 818.723    |
|       | 38:6              | 16:0/22:6   | 806.569    | 48:2  |                   | 16:1_16:1_16:0 | 820.739    |
|       |                   | 18:1/20:5   | 806.569    |       |                   | 18:1_16:0_14:1 | 820.739    |
|       |                   | 18:2/20:4   | 806.569    |       |                   | 18:1_16:1_14:0 | 820.739    |
|       | 38:5              | 16:0/22:5   | 808.585    |       |                   | 18:1_18:1_12:0 | 820.739    |
|       |                   | 18:0/20:5   | 808.585    |       |                   | 18:2_16:0_14:0 | 820.739    |
|       |                   | 18:1/20:4   | 808.585    | 48:1  |                   | 16:1_16:0_16:0 | 822.755    |
|       | 38:4              | 16:0/22:4   | 810.601    |       |                   | 18:0_16:1_14:0 | 822.755    |
|       |                   | 18:0/20:4   | 810.601    |       |                   | 18:1_16:0_14:0 | 822.755    |
|       |                   | 18:1/20:3   | 810.601    | 48:0  |                   | 16:0_16:0_16:0 | 824.770    |
|       | 38:2              | 18:0/20:2   | 814.632    |       |                   | 18:0_16:0_14:0 | 824.770    |
|       |                   | 20:0/18:2   | 814.632    | 50:5  |                   | 18:2_18:2_14:1 | 842.723    |
|       |                   | 20:1/18:1   | 814.632    |       |                   | 18:3_16:1_16:1 | 842.723    |
|       | 40:8              | 20:4/20:4   | 830.569    |       |                   | 18:3_18:2_14:0 | 842.723    |
|       |                   | 22:6/18:2   | 830.569    | 50:4  |                   | 18:1_16:2_16:1 | 844.739    |
|       | 40:7              | 18:1/22:6   | 832.585    |       |                   | 18:2_16:1_16:1 | 844.739    |



|    |      |                |         |      |                |         |
|----|------|----------------|---------|------|----------------|---------|
|    |      | 20:3/20:4      | 832.585 |      | 18:2_18:1_14:1 | 844.739 |
|    |      | 22:5/18:2      | 832.585 |      | 18:2_18:2_14:0 | 844.739 |
|    | 40:6 | 18:0/22:6      | 834.601 |      | 18:3_16:1_16:0 | 844.739 |
|    |      | 18:1/22:5      | 834.601 |      | 18:3_18:1_14:0 | 844.739 |
|    |      | 20:2/20:4      | 834.601 | 50:3 | 18:1_16:1_16:1 | 846.755 |
|    |      | 20:3/20:3      | 834.601 |      | 18:1_18:1_14:1 | 846.755 |
| PE | 36:5 | 16:0/20:5      | 738.507 |      | 18:2_18:1_14:0 | 846.755 |
|    |      | 16:1/20:4      | 738.507 | 50:2 | 18:1_16:1_16:0 | 848.770 |
|    | 36:4 | 16:0/20:4      | 740.522 |      | 18:1_18:1_14:0 | 848.770 |
|    |      | 18:2/18:2      | 740.522 |      | 18:2_16:0_16:0 | 848.770 |
|    |      | 18:1/18:3      | 740.523 | 50:1 | 18:0_16:1_16:0 | 850.786 |
|    | 36:3 | 16:0/20:3      | 742.538 |      | 18:1_16:0_16:0 | 850.786 |
|    |      | 18:1/18:2      | 742.538 | 52:6 | 18:2_18:2_16:2 | 868.739 |
|    | 36:1 | 16:0/20:1      | 746.569 |      | 18:3_18:2_16:1 | 868.739 |
|    |      | 18:0/18:1      | 746.569 |      | 20:4_16:1_16:1 | 868.739 |
|    | 38:6 | 18:2/20:4      | 764.522 | 52:5 | 18:2_18:2_16:1 | 870.755 |
|    |      | 22:6/16:0      | 764.522 |      | 18:3_18:1_16:1 | 870.755 |
|    |      | 18:1/20:5      | 764.523 |      | 18:3_18:2_16:0 | 870.755 |
|    | 38:5 | 16:0/22:5      | 766.538 | 52:4 | 18:2_18:1_16:1 | 872.770 |
|    |      | 18:0/20:5      | 766.538 |      | 18:2_18:2_16:0 | 872.770 |
|    |      | 18:1/20:4      | 766.538 |      | 18:3_18:1_16:0 | 872.770 |
|    | 38:4 | 18:0/20:4      | 768.554 | 52:3 | 18:1_18:1_16:1 | 874.786 |
|    |      | 18:1/20:3      | 768.554 |      | 18:2_18:1_16:0 | 874.786 |
|    | 40:6 | 18:0/22:6      | 792.554 | 52:2 | 18:1_18:0_16:1 | 876.802 |
|    |      | 18:1/22:5      | 792.554 |      | 18:1_18:1_16:0 | 876.802 |
|    | 40:5 | 18:0/22:5      | 794.569 |      | 18:2_18:0_16:0 | 876.802 |
|    |      | 20:1/20:4      | 794.569 | 52:1 | 18:0_18:0_16:1 | 878.817 |
| TG | 40:1 | 14:1_14:0_12:0 | 710.629 |      | 18:1_18:0_16:0 | 878.817 |
|    |      | 16:1_12:0_12:0 | 710.629 | 54:7 | 18:3_18:2_18:2 | 894.755 |
|    | 40:0 | 14:0_14:0_12:0 | 712.645 |      | 20:4_18:2_16:1 | 894.755 |
|    |      | 16:0_12:0_12:0 | 712.645 | 54:6 | 18:2_18:2_18:2 | 896.770 |
|    | 42:2 | 16:1_14:1_12:0 | 736.645 |      | 18:3_18:2_18:1 | 896.770 |
|    |      | 16:1_14:1_12:0 | 736.645 |      | 20:4_18:1_16:1 | 896.770 |
|    |      | 18:2_12:0_12:0 | 736.645 | 54:5 | 18:2_18:2_18:1 | 898.786 |
|    | 42:1 | 14:1_14:0_14:0 | 738.661 |      | 18:3_18:1_18:1 | 898.786 |
|    |      | 16:0_14:1_12:0 | 738.661 |      | 20:3_18:2_16:0 | 898.786 |
|    |      | 16:1_14:0_12:0 | 738.661 | 54:4 | 18:2_18:1_18:1 | 900.802 |
|    |      | 18:1_12:0_12:0 | 738.661 |      | 18:2_18:2_18:0 | 900.802 |
|    | 42:0 | 14:0_14:0_14:0 | 740.676 |      | 20:3_18:1_16:0 | 900.802 |
|    |      | 16:0_14:0_12:0 | 740.676 | 54:3 | 18:1_18:1_18:1 | 902.817 |
|    | 44:2 | 16:0_14:1_14:1 | 764.676 |      | 18:2_18:1_18:0 | 902.817 |
|    |      | 16:1_14:1_14:0 | 764.676 |      | 20:2_18:1_16:0 | 902.817 |
|    |      | 16:1_16:1_12:0 | 764.676 | 54:2 | 18:1_18:1_18:0 | 904.833 |
|    |      | 18:1_14:1_12:0 | 764.676 |      | 20:1_18:1_16:0 | 904.833 |
|    |      | 18:2_14:0_12:0 | 764.676 | 54:0 | 18:0_18:0_18:0 | 908.864 |

|      |                |         |      |                |         |
|------|----------------|---------|------|----------------|---------|
| 44:1 | 16:0_14:1_14:0 | 766.692 |      | 24:0_16:0_14:0 | 908.864 |
|      | 16:1_14:0_14:0 | 766.692 | 56:8 | 20:4_18:2_18:2 | 920.770 |
|      | 16:1_16:0_12:0 | 766.692 |      | 22:6_18:2_16:0 | 920.770 |
|      | 18:1_14:0_12:0 | 766.692 | 56:7 | 20:4_18:2_18:1 | 922.786 |
| 44:0 | 16:0_14:0_14:0 | 768.708 |      | 20:5_18:1_18:1 | 922.786 |
|      | 16:0_16:0_12:0 | 768.708 |      | 22:5_18:2_16:0 | 922.786 |
|      | 18:0_14:0_12:0 | 768.708 | 56:6 | 20:4_18:1_18:1 | 924.802 |
| 46:3 | 16:1_16:1_14:1 | 790.692 |      | 22:4_18:2_16:0 | 924.802 |
|      | 18:1_14:1_14:1 | 790.692 |      | 22:5_18:1_16:0 | 924.802 |

Table S3: List of lipid standards used for this study. Lipids marked with \* were used to prepare an internal standard lipid mixture.

| No. | Class   | Acyl Chains                | No. | Class   | Acyl Chains                     |
|-----|---------|----------------------------|-----|---------|---------------------------------|
| 1   | LPC     | 16:0                       | 25  | LPG     | 17:1                            |
| 2   | LPC     | 17:1                       | 26  | LPG     | 13:0*                           |
| 3   | LPC     | 18:1-D <sub>7</sub> *      | 27  | PG      | 17:0/17:0                       |
| 4   | PC      | 15:0/18:1-D <sub>7</sub> * | 28  | PG      | 15:0/18:1-D <sub>7</sub> *      |
| 5   | PC      | 16:0/16:0                  | 29  | LPI     | 17:1                            |
| 6   | PC      | 17:0/17:0                  | 30  | LPI     | 13:0*                           |
| 7   | PC      | 18:1/18:0                  | 31  | PI      | 16:0-D <sub>31</sub> /18:1      |
| 8   | EtherPC | P-18:0/18:1-D <sub>9</sub> | 32  | PI      | 15:0/18:1-D <sub>7</sub> *      |
| 9   | LPE     | 14:0                       | 33  | SM      | d18:1/17:0                      |
| 10  | LPE     | 17:1                       | 34  | SM      | d18:1/18:1-D <sub>9</sub> *     |
| 11  | LPE     | 18:1-D <sub>7</sub> *      | 35  | Cer     | d18:1/17:0                      |
| 12  | PE      | 12:0/12:0                  | 36  | Cer     | d18:1-D <sub>7</sub> /24:1      |
| 13  | PE      | 16:0/16:0                  | 37  | Cer     | d18:1-D <sub>7</sub> /24:0*     |
| 14  | PE      | 15:0/18:1-D <sub>7</sub> * | 38  | HexCer  | d18:1/17:0                      |
| 15  | PE      | 17:0/17:0                  | 39  | HexCer  | d18:1-D <sub>7</sub> /15:0*     |
| 16  | EtherPE | P-18:0/18:1-D <sub>9</sub> | 40  | Hex2Cer | d18:1/16:0                      |
| 17  | LPA     | 17:0*                      | 41  | Hex2Cer | d18:1/17:0                      |
| 18  | LPA     | 17:1                       | 42  | Hex2Cer | d18:1-D <sub>7</sub> /15:0*     |
| 19  | PA      | 15:0/18:1-D <sub>7</sub> * | 43  | DG      | 15:0/18:1-D <sub>7</sub> *      |
| 20  | PA      | 17:0/17:0                  | 44  | DG      | 1,3-18:0-D <sub>5</sub>         |
| 21  | LPS     | 17:1                       | 45  | TG      | 15:0/18:1-D <sub>7</sub> /15:0* |
| 22  | LPS     | 13:0*                      | 46  | TG      | 17:0/17:1/17:0-D <sub>5</sub>   |
| 23  | PS      | 17:0/17:0                  | 47  | CE      | 17:0                            |
| 24  | PS      | 15:0/18:1-D <sub>7</sub> * | 48  | CE      | 18:1-D <sub>7</sub> *           |

Table S4: Type of precursor and quantifier ions of each lipid class and collision energy for SRM quantification

| No. | Class       | Acyl chain                    |                                | Type of precursor<br>/quantifier ions                              | m/z              |                   | m/z               |                   | Collision<br>energy<br>(V) |
|-----|-------------|-------------------------------|--------------------------------|--------------------------------------------------------------------|------------------|-------------------|-------------------|-------------------|----------------------------|
|     |             | calibration                   | Internal                       |                                                                    | calibration      |                   | internal standard |                   |                            |
|     |             | standard                      | standard                       |                                                                    | precursor<br>ion | quantifier<br>ion | precursor<br>ion  | quantifier<br>ion |                            |
| 1   | LPC         | 17:01                         | 18:1-D <sub>7</sub>            | [M+H] <sup>+</sup> /[Pcho+H] <sup>+</sup>                          | 508.5            | 184.5             | 529.5             | 184.5             | 40                         |
| 2   | PC          | 17:0/17:0                     | 15:0/18:1-D <sub>7</sub>       | [M+H] <sup>+</sup> /[Pcho+H] <sup>+</sup>                          | 762.5            | 184.5             | 753.5             | 184.5             | 40                         |
| 3   | Ether<br>PC | P-18:0/18:1-D <sub>9</sub>    | PC 15:0/18:1-D <sub>7</sub>    | [M+H] <sup>+</sup> /[Pcho+H] <sup>+</sup>                          | 781.5            | 184.5             | 753.5             | 184.5             | 40                         |
| 4   | LPE         | 17:01                         | 18:1-D <sub>7</sub>            | [M+H] <sup>+</sup> /[M+H-141] <sup>+</sup>                         | 466.5            | 325.5             | 487.5             | 346.5             | 20                         |
| 5   | PE          | 17:0/17:0                     | 15:0/18:1-D <sub>7</sub>       | [M+H] <sup>+</sup> /[M+H-141] <sup>+</sup><br>[M+H] <sup>+</sup> / | 720.5            | 579.5             | 711.5             | 570.5             | 20                         |
| 6   | Ether<br>PE | P-18:0/18:1-D <sub>9</sub>    | PE 15:0/18:1-D <sub>7</sub>    | [M+H-<br>RCOOCH <sub>2</sub> CHCH <sub>2</sub> OH] <sup>+</sup>    | 739.5            | 512.5             | 711.5             | 570.5             | 30                         |
| 7   | LPA         | 17:00                         | 17:01                          | [M-H] <sup>-</sup> /[M-H-RCOOH] <sup>-</sup>                       | 423.5            | 269.5             | 421.5             | 267.5             | 35                         |
| 8   | LPG         | 17:01                         | 13:00                          | [M-H] <sup>-</sup> /[RCOO] <sup>-</sup>                            | 495.5            | 267.5             | 441.5             | 213.5             | 35                         |
| 9   | PG          | 17:0/17:0                     | 15:0/18:1-D <sub>7</sub>       | [M-H] <sup>-</sup> /[RCOO] <sup>-</sup>                            | 749.5            | 269.5             | 740.5             | 241.5             | 35                         |
| 10  | LPI         | 17:01                         | 13:00                          | [M-H] <sup>-</sup> /[RCOO] <sup>-</sup>                            | 583.5            | 267.5             | 529.5             | 213.5             | 35                         |
| 11  | PI          | 16:0-D <sub>31</sub> /18:1    | 15:0/18:1-D <sub>7</sub>       | [M-H] <sup>-</sup> /[RCOO] <sup>-</sup>                            | 865.5            | 286.5             | 828.5             | 241.5             | 35                         |
| 12  | SM          | d18:1/17:0                    | d18:1/18:1-D <sub>9</sub>      | [M+H] <sup>+</sup> /[Pcho+H] <sup>+</sup>                          | 717.5            | 184.5             | 738.5             | 184.5             | 40                         |
| 13  | Cer         | d18:1-D <sub>7</sub> /24:1    | d18:1-D <sub>7</sub> /24:0     | [M+H] <sup>+</sup> /[d18:1] <sup>+</sup>                           | 655.5            | 271.5             | 657.5             | 271.5             | 30                         |
| 14  | Hex<br>Cer  | d18:1/17:0                    | d18:1-D <sub>7</sub> /15:0     | [M+H] <sup>+</sup> /[d18:1] <sup>+</sup>                           | 714.5            | 271.5             | 693.5             | 264.5             | 30                         |
| 15  | Hex2<br>Cer | d18:1/17:0                    | d18:1-D <sub>7</sub> /13:0     | [M+H] <sup>+</sup> /[d18:1] <sup>+</sup>                           | 876.5            | 271.5             | 855.5             | 264.5             | 50                         |
| 16  | DG          | 1,3-18:0-D <sub>5</sub>       | 15:0/18:1-D <sub>7</sub>       | [M+NH <sub>4</sub> ] <sup>+</sup> /[M+H-<br>RCOOH] <sup>+</sup>    | 647.5            | 341.5             | 605.5             | 290.5             | 35                         |
| 17  | TG          | 17:0/17:1/17:0-D <sub>5</sub> | 15:0/18:1-D <sub>7</sub> /15:0 | [M+NH <sub>4</sub> ] <sup>+</sup> /[M+H-<br>RCOOH] <sup>+</sup>    | 869.5            | 582.5             | 829.5             | 514.5             | 35                         |
| 18  | CE          | 17:00                         | 18:1-D <sub>7</sub>            | [M+NH <sub>4</sub> ] <sup>+</sup> /[Chole] <sup>+</sup>            | 656.5            | 369.5             | 675.5             | 369.5             | 30                         |

※ 141 Da : ethanolamine, Pcho : phosphocholine, Chole : Cholesterol

Table S5: Slopes and intercepts of the calibration curve of each lipid class. Numbers with red color represent the negative value.

| Saliva  |         |             |                |
|---------|---------|-------------|----------------|
| class   | slope   | y-intercept | R <sup>2</sup> |
| LPC     | 1.9913  | 0.0585      | 0.998          |
| PC      | 4.2368  | (0.1765)    | 0.997          |
| EtherPC | 1.2347  | 0.1388      | 0.992          |
| LPE     | 1.9064  | 0.0464      | 0.993          |
| PE      | 14.2269 | (0.3364)    | 0.992          |
| EtherPE | 1.8008  | 0.2004      | 0.992          |
| LPA     | 2.0119  | 0.0064      | 0.994          |
| PA      | 0.4716  | 0.0057      | 0.993          |
| LPS     | 0.9314  | 0.3693      | 0.995          |
| PS      | 0.8169  | 0.2198      | 0.995          |
| LPG     | 7.7986  | (0.0219)    | 0.995          |
| PG      | 1.9112  | (0.0670)    | 0.996          |
| LPI     | 0.0792  | 0.0192      | 0.999          |
| PI      | 0.7823  | 0.0037      | 0.996          |
| SM      | 0.8927  | 0.8497      | 0.994          |
| Cer     | 4.2431  | 0.1077      | 0.999          |
| HexCer  | 2.3422  | 0.0072      | 0.990          |
| Hex2Cer | 0.2956  | 0.0586      | 0.996          |
| DG      | 0.4466  | 0.0054      | 1.000          |
| TG      | 0.7076  | 0.0323      | 0.999          |
| CE      | 0.5914  | 0.0630      | 0.997          |
| Plasma  |         |             |                |
| class   | slope   | y-intercept | R <sup>2</sup> |
| LPC     | 2.6673  | 0.2034      | 0.997          |
| PC      | 4.4555  | (0.0463)    | 0.995          |
| EtherPC | 2.2140  | (0.0049)    | 0.999          |
| LPE     | 2.2037  | (0.0832)    | 0.996          |
| PE      | 0.9412  | 0.0139      | 0.988          |
| EtherPE | 0.9986  | (0.0192)    | 0.984          |
| LPG     | 0.1864  | (0.0106)    | 0.994          |
| PG      | 0.5927  | (0.0356)    | 0.992          |
| LPI     | 0.1218  | (0.0012)    | 0.991          |
| PI      | 0.4714  | 0.0371      | 0.997          |
| SM      | 1.2610  | 0.0211      | 0.989          |
| Cer     | 1.5294  | (0.0330)    | 0.996          |
| HexCer  | 1.1734  | 0.0299      | 0.993          |
| DG      | 1.5608  | 0.1109      | 0.996          |
| TG      | 0.8722  | (0.0344)    | 0.997          |

|    |        |          |       |
|----|--------|----------|-------|
| CE | 2.4883 | (0.0957) | 0.984 |
|----|--------|----------|-------|

Table S6. Limit of detection (LOD) and limit of quantitation (LOQ) values of external lipid standards based on calibration curves and the type of internal standards spiked to lipid extracts by nUHPLC-ESI-MS/MS.

| Saliva  |                               |                                |            |            |
|---------|-------------------------------|--------------------------------|------------|------------|
| class   | external standard             | internal standard              | LOD (pmol) | LOQ (pmol) |
| LPC     | 17:1                          | 18:1-D <sub>7</sub>            | 0.05       | 0.17       |
| PC      | 17:0/17:0                     | 15:0/18:1-D <sub>7</sub>       | 0.09       | 0.29       |
| EtherPC | P-18:0/18:1-D <sub>9</sub>    | PC 15:0/18:1-D <sub>7</sub>    | 0.07       | 0.24       |
| LPE     | 17:1                          | 18:1-D <sub>7</sub>            | 0.04       | 0.12       |
| PE      | 17:0/17:0                     | 15:0/18:1-D <sub>7</sub>       | 0.13       | 0.42       |
| EtherPE | P-18:0/18:1-D <sub>9</sub>    | PE 15:0/18:1-D <sub>7</sub>    | 0.08       | 0.26       |
| LPA     | 17:0                          | 17:1                           | 0.02       | 0.06       |
| PA      | 17:0/17:0                     | 15:0/18:1-D <sub>7</sub>       | 0.08       | 0.27       |
| LPS     | 17:1                          | 13:0                           | 0.21       | 0.71       |
| PS      | 17:0/17:0                     | 15:0/18:1-D <sub>7</sub>       | 0.10       | 0.35       |
| LPG     | 17:1                          | 13:0                           | 0.06       | 0.20       |
| PG      | 17:0/17:0                     | 15:0/18:1-D <sub>7</sub>       | 0.11       | 0.36       |
| LPI     | 17:1                          | 13:0                           | 0.09       | 0.30       |
| PI      | 16:0-D <sub>31</sub> /18:1    | 15:0/18:1-D <sub>7</sub>       | 0.00       | 0.01       |
| SM      | d18:1/17:0                    | d18:1/18:1-D <sub>9</sub>      | 0.12       | 0.40       |
| Cer     | d18:1-D <sub>7</sub> /24:1    | d18:1-D <sub>7</sub> /24:0     | 0.03       | 0.10       |
| HexCer  | d18:1/17:0                    | d18:1-D <sub>7</sub> /15:0     | 0.07       | 0.25       |
| Hex2Cer | d18:1/17:0                    | d18:1-D <sub>7</sub> /15:0     | 0.01       | 0.03       |
| DG      | 1,3-18:0-D <sub>5</sub>       | 15:0/18:1-D <sub>7</sub>       | 0.01       | 0.04       |
| TG      | 17:0/17:1/17:0-D <sub>5</sub> | 15:0/18:1-D <sub>7</sub> /15:0 | 0.02       | 0.05       |
| CE      | 17:0                          | 18:1-D <sub>7</sub>            | 0.07       | 0.25       |
| Plasma  |                               |                                |            |            |
| class   | external standard             | internal standard              | LOD (pmol) | LOQ (pmol) |
| LPC     | 17:1                          | 18:1-D <sub>7</sub>            | 0.09       | 0.29       |
| PC      | 17:0/17:0                     | 15:0/18:1-D <sub>7</sub>       | 0.04       | 0.14       |
| EtherPC | P-18:0/18:1-D <sub>9</sub>    | PC 15:0/18:1-D <sub>7</sub>    | 0.06       | 0.21       |
| LPE     | 17:1                          | 18:1-D <sub>7</sub>            | 0.06       | 0.19       |
| PE      | 17:0/17:0                     | 15:0/18:1-D <sub>7</sub>       | 0.05       | 0.18       |
| EtherPE | P-18:0/18:1-D <sub>9</sub>    | PE 15:0/18:1-D <sub>7</sub>    | 0.04       | 0.14       |
| LPG     | 17:1                          | 13:0                           | 0.02       | 0.06       |
| PG      | 17:0/17:0                     | 15:0/18:1-D <sub>7</sub>       | 0.10       | 0.34       |
| LPI     | 17:1                          | 13:0                           | 0.08       | 0.27       |
| PI      | 16:0-D <sub>31</sub> /18:1    | 15:0/18:1-D <sub>7</sub>       | 0.08       | 0.25       |
| SM      | d18:1/17:0                    | d18:1/18:1-D <sub>9</sub>      | 0.13       | 0.43       |

|        |                               |                                |      |      |
|--------|-------------------------------|--------------------------------|------|------|
| Cer    | d18:1-D <sub>7</sub> /24:1    | d18:1-D <sub>7</sub> /24:0     | 0.05 | 0.18 |
| HexCer | d18:1/17:0                    | d18:1-D <sub>7</sub> /15:0     | 0.05 | 0.18 |
| DG     | 1,3-18:0-D <sub>5</sub>       | 15:0/18:1-D <sub>7</sub>       | 0.10 | 0.33 |
| TG     | 17:0/17:1/17:0-D <sub>5</sub> | 15:0/18:1-D <sub>7</sub> /15:0 | 0.03 | 0.08 |
| CE     | 17:0                          | 18:1-D <sub>7</sub>            | 0.07 | 0.25 |

※ Limit of detection =  $3 \times$  standard deviation of y-intercept / slope,

Limit of quantitation =  $10 \times$  standard deviation of y-intercept / slope

Table S7. Characteristics of patients with lung cancer and healthy controls.

| Examined Parameter                 | LC Patients (%)<br>(n=26) | Controls (%)<br>(n=30) |
|------------------------------------|---------------------------|------------------------|
| <b>Age (range)</b>                 | 62.1 (44–82)              | 59.5 (41–80)           |
| <b>Gender</b>                      |                           |                        |
| Female                             | 11 (42.3)                 | 13 (43.3)              |
| Male                               | 15 (57.7)                 | 17 (56.7)              |
| <b>Smoking status</b>              |                           |                        |
| Never                              | 4 (15.4)                  | 7 (23.3)               |
| Previous                           | 19 (73.1)                 | 16 (53.3)              |
| Current                            | 3 (11.5)                  | 7 (23.3)               |
| <b>Comorbid diseases</b>           |                           |                        |
| Cardiovascular disease             | 2 (7.7)                   | 2 (6.7)                |
| Hypertension                       | 7 (26.9)                  | 8 (26.7)               |
| Diabetes mellitus                  | 2 (7.7)                   | 3 (10)                 |
| <b>Staging according to TNM</b>    |                           |                        |
| I                                  | 6 (23.1)                  |                        |
| II                                 | 3 (11.5)                  |                        |
| III                                | 10 (38.5)                 |                        |
| IV                                 | 7 (26.9)                  |                        |
| <b>Pathological classification</b> |                           |                        |
| Adenocarcinoma                     | 19 (73.1)                 |                        |
| Squamous carcinoma                 | 7 (26.9)                  |                        |
| <b>Tumor location</b>              |                           |                        |
| left-side                          | 9 (34.6)                  |                        |
| right-side                         | 17 (65.4)                 |                        |
| <b>Anatomical type</b>             |                           |                        |
| Peripheral carcinoma               | 21 (80.8)                 |                        |
| Central carcinoma                  | 5 (19.2)                  |                        |
| <b>Treatment</b>                   |                           |                        |

| Examined Parameter         | LC Patients (%)<br>(n=26) | Controls (%)<br>(n=30) |
|----------------------------|---------------------------|------------------------|
| Chemotherapy               | 19 (73.1)                 |                        |
| Chemotherapy+Immunotherapy | 4 (15.4)                  |                        |
| Chemotherapy+Radiotherapy  | 3 (11.5)                  |                        |
